# Supplementary material for: Two types of Ln2Cu2 hydroxo-trimethylacetate complexes with 0D and 1D motifs: synthetic features, structural differences, and slow magnetic relaxation
Source: Royal Society of Chemistry journal article supplement (doi:10.1039/d1dt01161h), 2021-01-01
Supplement: d1dt01161h1.pdf [file d1dt01161h1.pdf]

## I. Crystal structure description

**Table S1.** Selected bond lengths, the shortest interatomic distances  $d$  (Å) and angles  $\omega$  (°) for **1<sub>Gd</sub>**.

| Bond/Distance                        | $d$        | Bond/Distance           | $d$        |
|--------------------------------------|------------|-------------------------|------------|
| Gd1–O8 <sup>i</sup>                  | 2.347(3)   | Gd1–O4                  | 2.510(3)   |
| Gd1–O5                               | 2.368(3)   | Gd1–O1                  | 2.575(3)   |
| Gd1–O1W                              | 2.404(3)   | Cu1–O7                  | 1.919(3)   |
| Gd1–O9 <sup>i</sup>                  | 2.417(3)   | Cu1–O6                  | 1.926(3)   |
| Gd1–O3                               | 2.444(3)   | Cu1–O9                  | 1.962(3)   |
| Gd1–O2W                              | 2.468(3)   | Cu1–O9 <sup>i</sup>     | 1.974(3)   |
| Gd1–O2                               | 2.479(3)   | Cu1···Cu1 <sup>i</sup>  | 3.0449(12) |
| Angle                                | $\omega$   | Angle                   | $\omega$   |
| O8 <sup>i</sup> –Gd1–O5              | 144.48(11) | O8 <sup>i</sup> –Gd1–O4 | 74.24(12)  |
| O8 <sup>i</sup> –Gd1–O1W             | 142.08(12) | O5–Gd1–O4               | 73.30(12)  |
| O5–Gd1–O1W                           | 71.49(12)  | O1W–Gd1–O4              | 126.89(13) |
| O8 <sup>i</sup> –Gd1–O9 <sup>i</sup> | 77.54(10)  | O9 <sup>i</sup> –Gd1–O4 | 67.99(9)   |
| O5–Gd1–O9 <sup>i</sup>               | 77.26(10)  | O3–Gd1–O4               | 52.50(10)  |
| O1W–Gd1–O9 <sup>i</sup>              | 136.89(10) | O2W–Gd1–O4              | 115.88(12) |
| O8 <sup>i</sup> –Gd1–O3              | 92.07(12)  | O2–Gd1–O4               | 139.29(12) |
| O5–Gd1–O3                            | 79.42(11)  | O8 <sup>i</sup> –Gd1–O1 | 119.48(11) |
| O1W–Gd1–O3                           | 82.71(12)  | O5–Gd1–O1               | 73.91(10)  |
| O9 <sup>i</sup> –Gd1–O3              | 120.02(10) | O1W–Gd1–O1              | 73.09(11)  |
| O8 <sup>i</sup> –Gd1–O2W             | 71.99(12)  | O9 <sup>i</sup> –Gd1–O1 | 70.18(9)   |
| O5–Gd1–O2W                           | 136.61(11) | O3–Gd1–O1               | 148.42(10) |
| O1W–Gd1–O2W                          | 70.29(12)  | O2W–Gd1–O1              | 112.87(12) |
| O9 <sup>i</sup> –Gd1–O2W             | 146.13(11) | O2–Gd1–O1               | 50.97(10)  |
| O3–Gd1–O2W                           | 76.12(11)  | O4–Gd1–O1               | 131.15(10) |
| O8 <sup>i</sup> –Gd1–O2              | 74.50(12)  | O7–Cu1–O6               | 89.25(13)  |
| O5–Gd1–O2                            | 124.71(11) | O7–Cu1–O9               | 96.54(12)  |
| O1W–Gd1–O2                           | 93.68(13)  | O6–Cu1–O9               | 167.27(13) |
| O9 <sup>i</sup> –Gd1–O2              | 80.31(11)  | O7–Cu1–O9 <sup>i</sup>  | 172.51(13) |
| O3–Gd1–O2                            | 153.18(11) | O6–Cu1–O9 <sup>i</sup>  | 96.63(12)  |
| O2W–Gd1–O2                           | 77.65(12)  | O9–Cu1–O9 <sup>i</sup>  | 78.64(12)  |

Symmetry code: (i)  $-x+1, -y+1, -z+1$ .

**Table S2.** Hydrogen bonding parameters of structure **1<sub>Gd</sub>**.

| Fragment D–H···A            | Distance/ Å |       |          | D–H···A /° |
|-----------------------------|-------------|-------|----------|------------|
|                             | D–H         | H···A | D···A    |            |
| O1–H1WB···O1S               | 0.88        | 1.85  | 2.698(6) | 159.3      |
| O1W–H1WA···O3 <sup>i</sup>  | 0.86        | 1.82  | 2.635(4) | 157.3      |
| O2W–H2WB···O1W <sup>i</sup> | 0.81        | 2.37  | 3.140(5) | 159.4      |
| O2W–H2WA···O2S              | 0.76        | 2.08  | 2.721(7) | 142.3      |
| O1S–H1SO···O1               | 0.99        | 1.73  | 2.712(5) | 177.8      |
| O2S–H2SO···O2               | 0.95        | 1.90  | 2.766(7) | 150.0      |

Symmetry code: (i)  $-x, -y+1, -z+1$ .

**Table S3.** Selected bond lengths, the shortest interatomic distances  $d$  (Å) and angles  $\omega$  (°) for **2<sub>Dy</sub>**.

| Bond/Distance                          | $d$        | Bond/Distance                          | $d$        |
|----------------------------------------|------------|----------------------------------------|------------|
| Dy1–O10 <sup>i</sup>                   | 2.337(2)   | Cu1–O9                                 | 1.942(2)   |
| Dy1–O7                                 | 2.441(2)   | Na1–O5 <sup>ii</sup>                   | 2.652(3)   |
| Dy1–O1 <sup>ii</sup>                   | 2.442(2)   | Na1–O2                                 | 2.254(3)   |
| Dy1–O5                                 | 2.254(2)   | Na1–O4 <sup>ii</sup>                   | 2.370(3)   |
| Dy1–O8                                 | 2.310(2)   | Na1–O4                                 | 2.238(3)   |
| Dy1–O12 <sup>i</sup>                   | 2.327(2)   | Na1–O3                                 | 2.277(5)   |
| Dy1–O6                                 | 2.436(3)   | Dy1⋯Cu1                                | 3.5090(5)  |
| Dy1–O2 <sup>ii</sup>                   | 2.452(2)   | Dy1⋯Cu1 <sup>i</sup>                   | 3.5104(6)  |
| Cu1–O10                                | 1.966(2)   | Dy1⋯Na1 <sup>ii</sup>                  | 3.7301(14) |
| Cu1–O10 <sup>i</sup>                   | 1.969(2)   | Cu1⋯Cu1 <sup>i</sup>                   | 3.0371(8)  |
| Cu1–O11                                | 1.947(2)   | Na1⋯Na1 <sup>ii</sup>                  | 3.366(3)   |
| Angle                                  | $\omega$   | Angle                                  | $\omega$   |
| O10 <sup>i</sup> –Dy1–O7               | 76.69(8)   | O8–Dy1–O1 <sup>ii</sup>                | 143.31(8)  |
| O10 <sup>i</sup> –Dy1–O1 <sup>ii</sup> | 77.11(8)   | O8–Dy1–O12 <sup>i</sup>                | 114.16(9)  |
| O10 <sup>i</sup> –Dy1–O6               | 128.04(8)  | O8–Dy1–O6                              | 82.33(10)  |
| O10 <sup>i</sup> –Dy1–O2 <sup>ii</sup> | 127.15(10) | O8–Dy1–O2 <sup>ii</sup>                | 157.68(9)  |
| O7–Dy1–O2 <sup>ii</sup>                | 100.78(9)  | O12 <sup>i</sup> –Dy1–O10 <sup>i</sup> | 74.42(8)   |
| O1 <sup>ii</sup> –Dy1–O7               | 73.33(8)   | O12 <sup>i</sup> –Dy1–O7               | 143.83(8)  |
| O1 <sup>ii</sup> –Dy1–O6               | 97.54(10)  | O12 <sup>i</sup> –Dy1–O1 <sup>ii</sup> | 79.35(9)   |
| O1 <sup>ii</sup> –Dy1–O2 <sup>ii</sup> | 52.85(8)   | O12 <sup>i</sup> –Dy1–O6               | 156.43(9)  |
| O5–Dy1–O10 <sup>i</sup>                | 140.73(9)  | O12 <sup>i</sup> –Dy1–O2 <sup>ii</sup> | 80.30(10)  |
| O5–Dy1–O7                              | 133.31(9)  | O6–Dy1–O7                              | 52.98(9)   |
| O5–Dy1–O1 <sup>ii</sup>                | 129.60(8)  | O6–Dy1–O2 <sup>ii</sup>                | 79.37(10)  |
| O5–Dy1–O8                              | 86.87(9)   | O10–Cu1–O10 <sup>i</sup>               | 78.96(10)  |
| O5–Dy1–O12 <sup>i</sup>                | 82.61(9)   | O11–Cu1–O10                            | 94.92(11)  |
| O5–Dy1–O6                              | 81.61(9)   | O11–Cu1–O10 <sup>i</sup>               | 171.59(10) |
| O5–Dy1–O2 <sup>ii</sup>                | 77.95(9)   | O9–Cu1–O10 <sup>i</sup>                | 95.05(9)   |
| O8–Dy1–O10 <sup>i</sup>                | 74.55(8)   | O9–Cu1–O10                             | 171.47(11) |
| O8–Dy1–O7                              | 77.82(9)   | O9–Cu1–O11                             | 91.55(10)  |

Symmetry codes: (i)  $-x+1, -y+1, -z$ ; (ii)  $-x+1, -y+2, -z+1$ .**Table S4.** Hydrogen bonding parameters of structure **2<sub>Dy</sub>**.

| Fragment D–H⋯A        | Distance/ Å |      |           | D–H⋯A /° |
|-----------------------|-------------|------|-----------|----------|
|                       | D–H         | H⋯A  | D⋯A       |          |
| O3–H3⋯O6 <sup>i</sup> | 0.82        | 1.94 | 2.727(5)  | 161      |
| O10–H10⋯O13           | 0.72        | 2.04 | 2.701(9)  | 154      |
| O10–H10⋯O13A          | 0.72        | 2.05 | 2.727(11) | 158      |

Symmetry codes: (i)  $1-x, 2-y, 1-z$ .

**Table S5.** Selected bond lengths, the shortest interatomic distances  $d$  (Å) and angles  $\omega$  (°) for **2<sub>Gd</sub>**.

| Bond/Distance                        | $d$        | Bond/Distance                          | $d$        |
|--------------------------------------|------------|----------------------------------------|------------|
| Gd1–O5                               | 2.288(3)   | Cu1–O9                                 | 1.947(3)   |
| Gd1–O6                               | 2.467(4)   | Na1–O5 <sup>i</sup>                    | 2.572(4)   |
| Gd1–O10                              | 2.364(3)   | Na1–O4 <sup>i</sup>                    | 2.385(4)   |
| Gd1–O1 <sup>i</sup>                  | 2.471(3)   | Na1–O4                                 | 2.226(4)   |
| Gd1–O8                               | 2.348(3)   | Na1–O2                                 | 2.238(4)   |
| Gd1–O7                               | 2.451(3)   | Na1–O3                                 | 2.265(5)   |
| Gd1–O12 <sup>ii</sup>                | 2.336(3)   | Gd1···Cu1                              | 3.501(3)   |
| Gd1–O2 <sup>i</sup>                  | 2.483(3)   | Gd1···Cu1 <sup>ii</sup>                | 3.502(3)   |
| Cu1–O10                              | 1.965(3)   | Gd1···Na1 <sup>i</sup>                 | 3.704(3)   |
| Cu1–O10 <sup>ii</sup>                | 1.978(3)   | Cu1···Cu1 <sup>ii</sup>                | 3.061(3)   |
| Cu1–O11                              | 1.948(3)   | Na1···Na1 <sup>i</sup>                 | 3.352(3)   |
| Angle                                | $\omega$   | Angle                                  | $\omega$   |
| O5–Gd1–O6                            | 81.35(12)  | O8–Gd1–O7                              | 143.21(11) |
| O5–Gd1–O10                           | 141.84(10) | O8–Gd1–O2 <sup>i</sup>                 | 79.26(13)  |
| O5–Gd1–O1 <sup>i</sup>               | 129.06(11) | O7–Gd1–O6                              | 52.99(11)  |
| O5–Gd1–O8                            | 83.54(12)  | O7–Gd1–O1 <sup>i</sup>                 | 73.40(11)  |
| O5–Gd1–O7                            | 132.96(11) | O7–Gd1–O2 <sup>i</sup>                 | 101.88(13) |
| O5–Gd1–O12 <sup>ii</sup>             | 87.24(11)  | O12 <sup>ii</sup> –Gd1–O6              | 82.37(12)  |
| O5–Gd1–O2 <sup>i</sup>               | 77.25(11)  | O12 <sup>ii</sup> –Gd1–O10             | 74.82(11)  |
| O6–Gd1–O1 <sup>i</sup>               | 96.58(12)  | O12 <sup>ii</sup> –Gd1–O1 <sup>i</sup> | 143.31(9)  |
| O6–Gd1–O2 <sup>i</sup>               | 79.66(12)  | O12 <sup>ii</sup> –Gd1–O8              | 115.08(12) |
| O10–Gd1–O6                           | 127.60(11) | O12 <sup>ii</sup> –Gd1–O7              | 77.12(12)  |
| O10–Gd1–O1 <sup>i</sup>              | 77.23(11)  | O12 <sup>ii</sup> –Gd1–O2 <sup>i</sup> | 157.77(11) |
| O10–Gd1–O7                           | 75.97(12)  | O10–Cu1–O10 <sup>ii</sup>              | 78.16(13)  |
| O10–Gd1–O2 <sup>i</sup>              | 126.90(10) | O11–Cu1–O10 <sup>ii</sup>              | 96.09(13)  |
| O1 <sup>i</sup> –Gd1–O2 <sup>i</sup> | 52.68(10)  | O11–Cu1–O10                            | 172.01(12) |
| O8–Gd1–O6                            | 156.30(10) | O9–Cu1–O10 <sup>ii</sup>               | 171.34(11) |
| O8–Gd1–O10                           | 74.54(11)  | O9–Cu1–O10                             | 95.25(13)  |
| O8–Gd1–O1 <sup>i</sup>               | 79.01(11)  | O9–Cu1–O11                             | 90.99(13)  |

Symmetry codes: (i)  $-x+1, -y+1, -z+1$ ; (ii)  $-x+1, -y+2, -z+2$ .**Table S6.** Hydrogen bonding parameters of structure **2<sub>Gd</sub>**.

| Fragment D–H···A        | Distance/ Å |       |           | D–H···A /° |
|-------------------------|-------------|-------|-----------|------------|
|                         | D–H         | H···A | D···A     |            |
| O3–H3···O6 <sup>i</sup> | 0.98        | 1.85  | 2.725(6)  | 148        |
| O10–H10···O13A          | 0.76        | 1.99  | 2.719(10) | 161        |
| O10–H10···O13B          | 0.76        | 1.92  | 2.670(15) | 165        |

Symmetry codes: (i)  $1-x, 1-y, 1-z$ .

**Table S7.** Selected bond lengths, the shortest interatomic distances  $d$  (Å) and angles  $\omega$  (°) for **2<sub>Tb</sub>**.

| Bond/Distance            | $d$        | Bond/Distance                          | $d$        |
|--------------------------|------------|----------------------------------------|------------|
| Tb1–O1 <sup>i</sup>      | 2.465(3)   | Cu1–O10 <sup>ii</sup>                  | 1.982(2)   |
| Tb1–O10                  | 2.342(3)   | Cu1–O7 <sup>ii</sup>                   | 2.432(4)   |
| Tb1–O5                   | 2.265(3)   | Na1–O5 <sup>i</sup>                    | 2.576(4)   |
| Tb1–O7                   | 2.426(3)   | Na1–O2                                 | 2.240(4)   |
| Tb1–O8                   | 2.335(3)   | Na1–O3                                 | 2.280(4)   |
| Tb1–O12 <sup>ii</sup>    | 2.317(3)   | Na1–O4 <sup>i</sup>                    | 2.381(3)   |
| Tb1–O2 <sup>i</sup>      | 2.457(3)   | Tb1···Cu1                              | 3.4931(8)  |
| Tb1–O6                   | 2.455(3)   | Tb1···Cu1 <sup>ii</sup>                | 3.4844(7)  |
| Cu1–O9                   | 1.948(3)   | Tb1···Na1 <sup>i</sup>                 | 3.699(2)   |
| Cu1–O11                  | 1.948(3)   | Cu1···Cu1 <sup>ii</sup>                | 3.0550(9)  |
| Cu1–O10                  | 1.970(3)   | Na1···Na1 <sup>i</sup>                 | 3.344(2)   |
| Angle                    | $\omega$   | Angle                                  | $\omega$   |
| O10–Tb1–O1 <sup>i</sup>  | 77.32(10)  | O12 <sup>ii</sup> –Tb1–O1 <sup>i</sup> | 143.05(9)  |
| O10–Tb1–O7               | 75.58(10)  | O12 <sup>ii</sup> –Tb1–O10             | 75.02(10)  |
| O10–Tb1–O2 <sup>i</sup>  | 126.78(10) | O12 <sup>ii</sup> –Tb1–O7              | 76.71(10)  |
| O10–Tb1–O6               | 127.52(10) | O12 <sup>ii</sup> –Tb1–O8              | 115.63(11) |
| O5–Tb1–O1 <sup>i</sup>   | 129.39(10) | O12 <sup>ii</sup> –Tb1–O2 <sup>i</sup> | 157.74(11) |
| O5–Tb1–O10               | 141.82(11) | O12 <sup>ii</sup> –Tb1–O6              | 82.47(11)  |
| O5–Tb1–O7                | 133.10(11) | O2 <sup>i</sup> –Tb1–O1 <sup>i</sup>   | 52.83(10)  |
| O5–Tb1–O8                | 83.53(10)  | O6–Tb1–O1 <sup>i</sup>                 | 95.63(11)  |
| O5–Tb1–O12 <sup>ii</sup> | 87.03(10)  | O6–Tb1–O2 <sup>i</sup>                 | 79.75(11)  |
| O5–Tb1–O2 <sup>i</sup>   | 77.23(10)  | O9–Cu1–O10 <sup>ii</sup>               | 171.80(12) |
| O5–Tb1–O6                | 81.55(11)  | O9–Cu1–O10                             | 94.95(11)  |
| O7–Tb1–O1 <sup>i</sup>   | 73.02(9)   | O9–Cu1–O7 <sup>ii</sup>                | 93.32(12)  |
| O7–Tb1–O2 <sup>i</sup>   | 102.65(10) | O11–Cu1–O9                             | 91.20(11)  |
| O7–Tb1–O6                | 53.13(11)  | O11–Cu1–O10                            | 171.83(13) |
| O8–Tb1–O1 <sup>i</sup>   | 79.42(9)   | O11–Cu1–O10 <sup>ii</sup>              | 95.59(11)  |
| O8–Tb1–O10               | 74.82(10)  | O11–Cu1–O7 <sup>ii</sup>               | 88.98(12)  |
| O8–Tb1–O7                | 143.12(10) | O10–Cu1–O10 <sup>ii</sup>              | 78.75(11)  |

Symmetry codes: (i)  $-x+1, -y+1, -z+1$ ; (ii)  $-x+1, -y, -z$ .**Table S8.** Hydrogen bonding parameters of structure **2<sub>Tb</sub>**.

| Fragment D–H···A        | Distance/ Å |       |          | D–H···A /° |
|-------------------------|-------------|-------|----------|------------|
|                         | D–H         | H···A | D···A    |            |
| O3–H3···O6 <sup>i</sup> | 0.84        | 1.94  | 2.728(6) | 156        |
| O10–H10···O13A          | 0.87        | 1.86  | 2.706(7) | 165        |
| O10–H10···O13B          | 0.87        | 1.83  | 2.67(2)  | 162        |

Symmetry codes: (i)  $1-x, 1-y, 1-z$ .

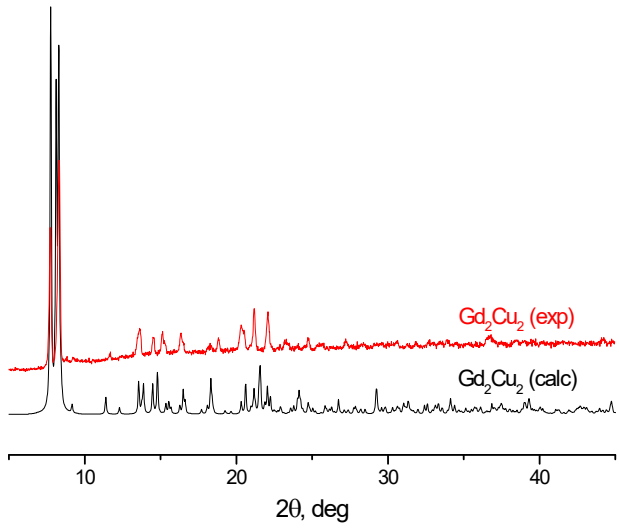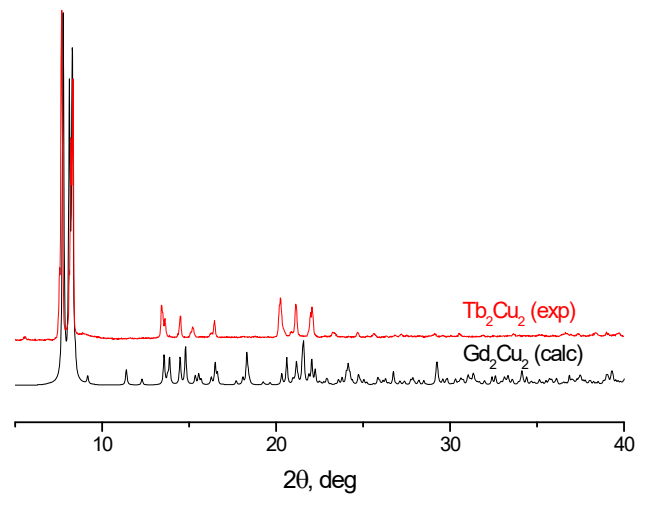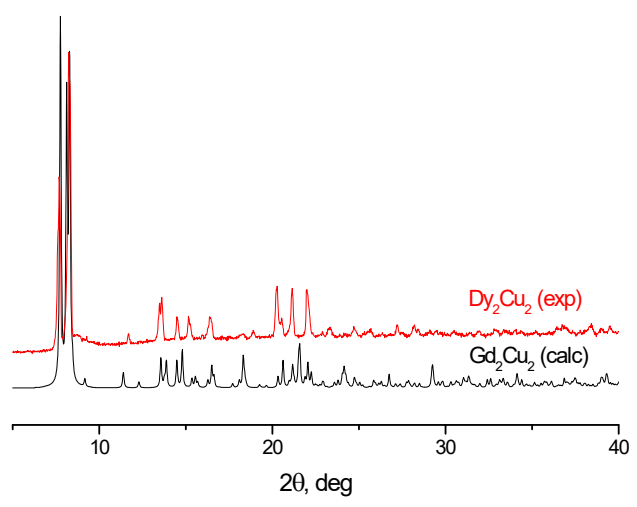

..

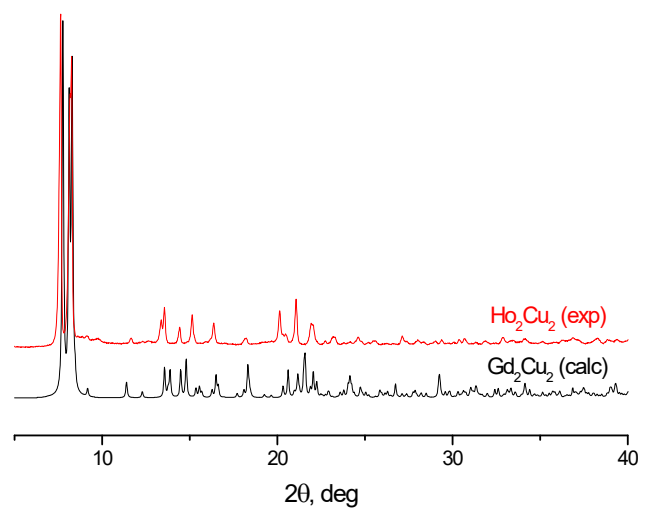

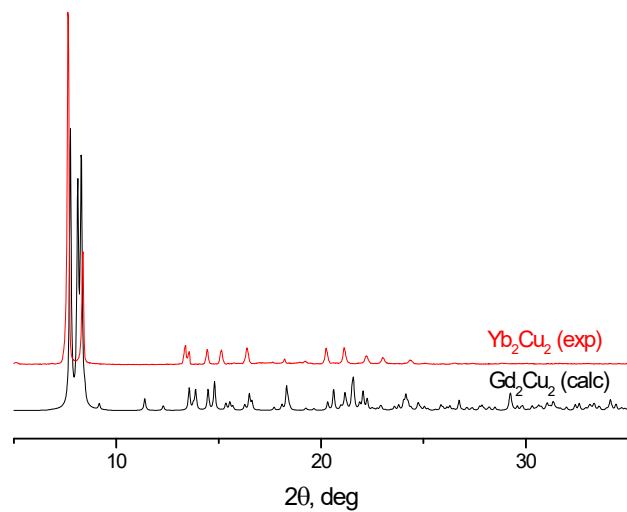

**Fig. S1.** Experimental PXRD patterns for a series of  $\mathbf{1}_{\text{Ln}}$  (Ln = Gd, Tb, Dy, Ho, Yb) measured at 273 K and their comparison with calculated data for  $\mathbf{1}_{\text{Gd}}$ .

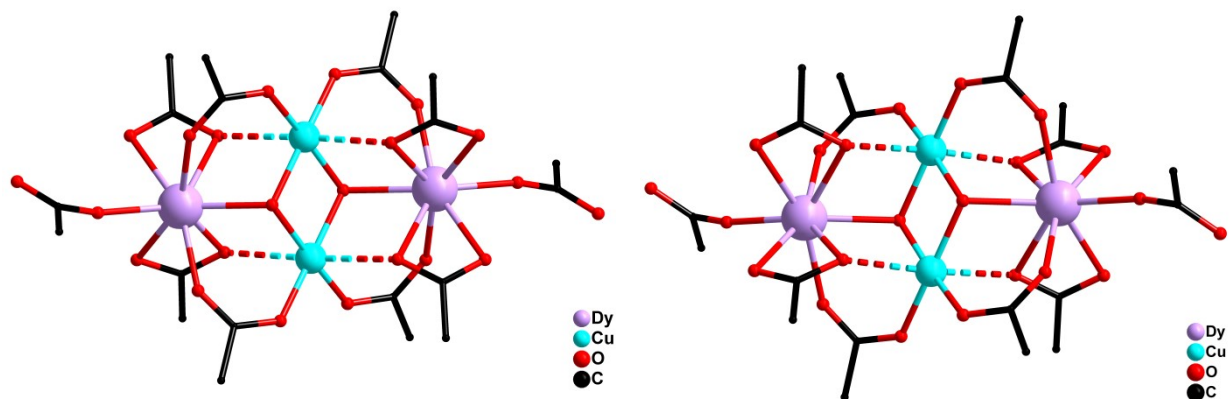

|                       | $2_{Dy}$             | $(iPr_2NH_2)_2[Cu_2Dy_2(OH)_2(piv)_{10}]$ |
|-----------------------|----------------------|-------------------------------------------|
| Cu–O(piv), Å          | 1.942(2), 1.947(2)   | 1.954                                     |
| Cu---O(piv), Å        | 2.568(3), 2.537(3)   | 2.398, 2.421                              |
| Cu–O( $\mu_3$ -OH), Å | 1.966(2) Å, 1.969(2) | 1.978                                     |
| Dy–O(piv), Å          | 2.254(2)–2.452(2)    | 2.244–2.478                               |
| Dy–O( $\mu_3$ -OH), Å | 2.337(2)             | 2.380                                     |
| Cu···Cu, Å            | 3.0371(8)            | 3.048                                     |
| Cu···Dy, Å            | 3.5090(5), 3.5104(6) | 3.481, 3.525                              |
| Cu–O–Dy,              | 108.8, 109.0         | 105.6, 107.6                              |
| Cu–O–Cu,              | 101.0°               | 100.8°                                    |

**Fig. S2.** Comparison of geometric parameters of the tetranuclear anionic fragments of  $2_{Dy}$  and published complex  $(iPr_2NH_2)_2[Cu_2Dy_2(OH)_2(piv)_{10}]$ .

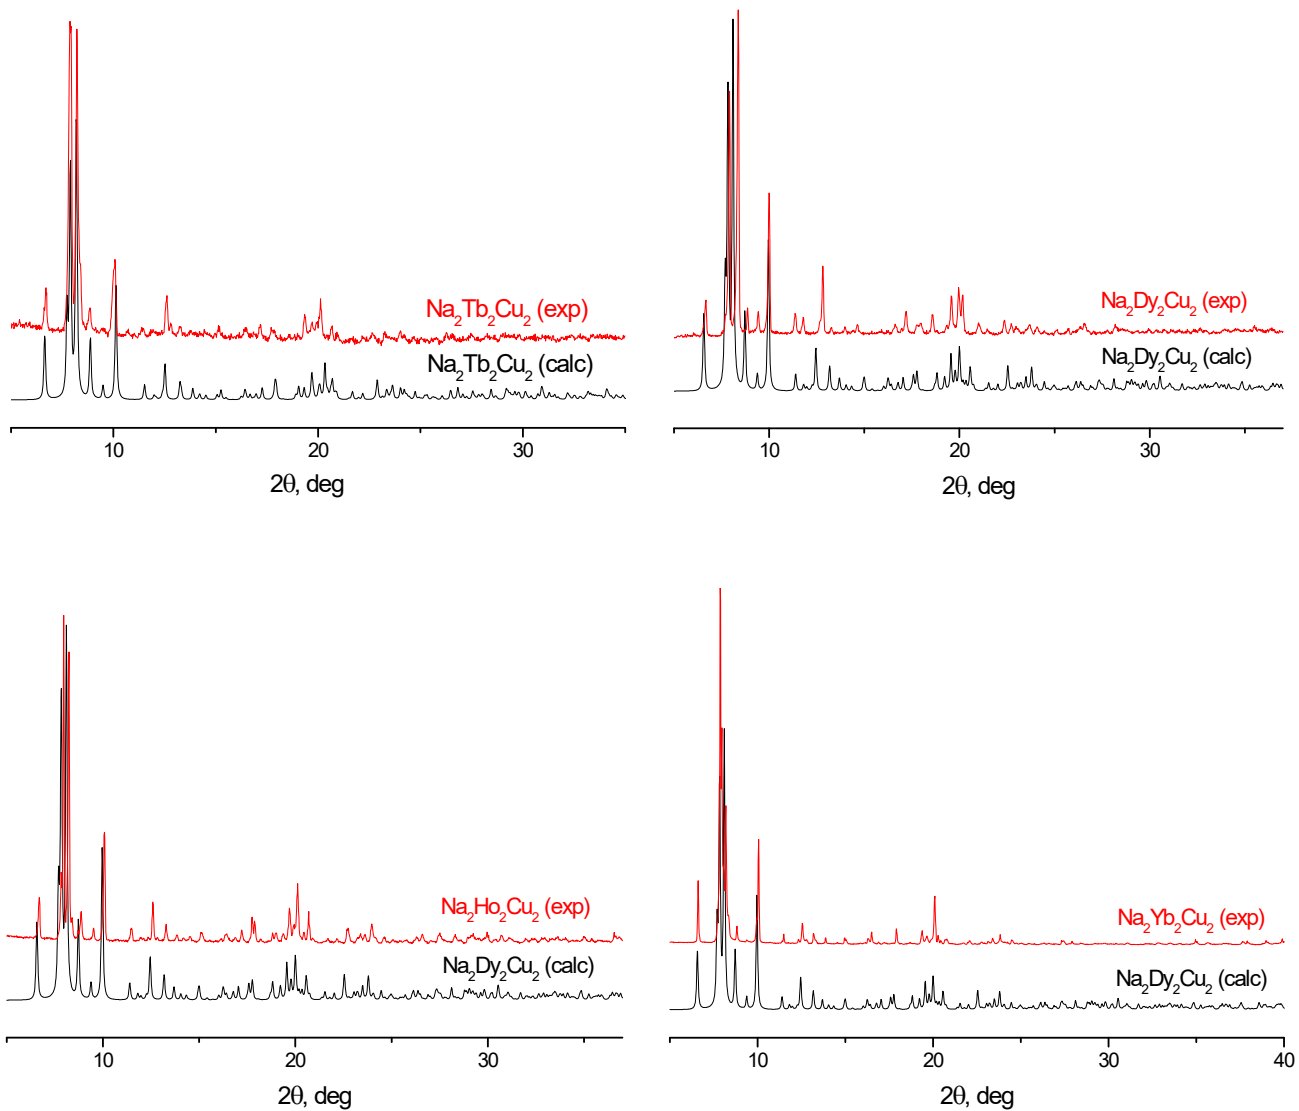

**Fig. S3.** Experimental PXRD patterns for a series of  $2\text{Ln}$  ( $\text{Ln} = \text{Tb}, \text{Dy}, \text{Ho}, \text{Yb}$ ) measured at 273 K and their comparison with calculated data for  $2\text{Tb}$  (for  $2\text{Tb}$ ) and  $2\text{Dy}$  (for  $2\text{Dy}, 2\text{Ho}, 2\text{Yb}$ ).



## II. Magnetic measurements

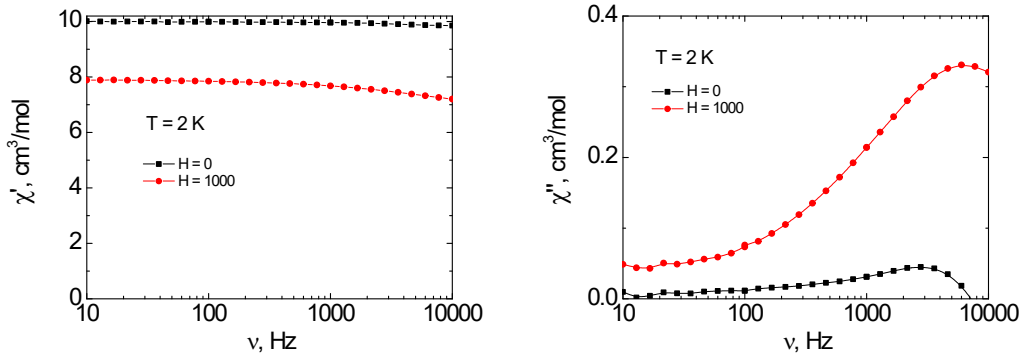

**Fig. S4.** Frequency dependencies of real,  $\chi'$  (left) and imaginary,  $\chi''$  (right) components of dynamic magnetic susceptibility for complex  $\mathbf{1}_{Tb}$  at  $T = 2$  K under various  $dc$  magnetic fields (Oe). Solid lines are visual guides.

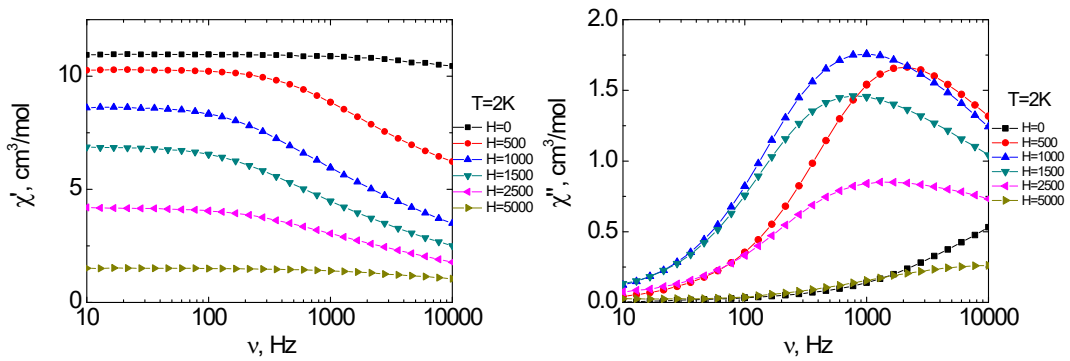

**Fig. S5.** Frequency dependencies of real,  $\chi'$  (left) and imaginary,  $\chi''$  (right) components of dynamic magnetic susceptibility for complex  $\mathbf{1}_{Dy}$  at  $T = 2$  K under various  $dc$  magnetic fields (Oe). Solid lines are visual guides.

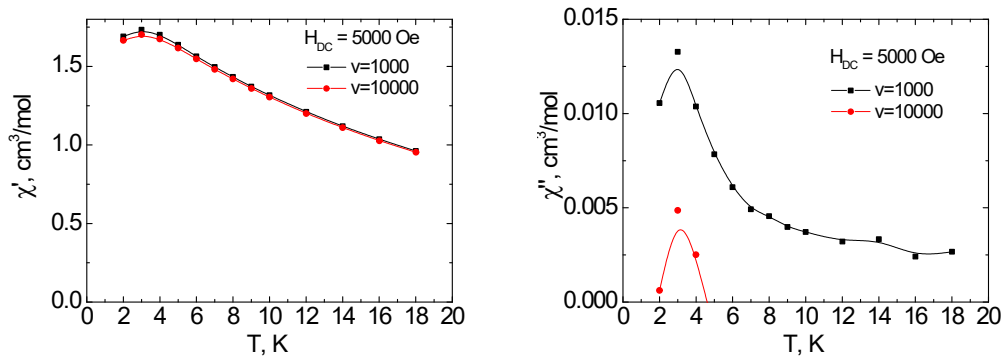

**Fig. S6.** Frequency dependencies of real,  $\chi'$  (left) and imaginary,  $\chi''$  (right) components of dynamic magnetic susceptibility for complex  $\mathbf{1}_{Ho}$  under  $H = 5000$  Oe at temperatures from 18 to 2 K. Solid lines are visual guides.

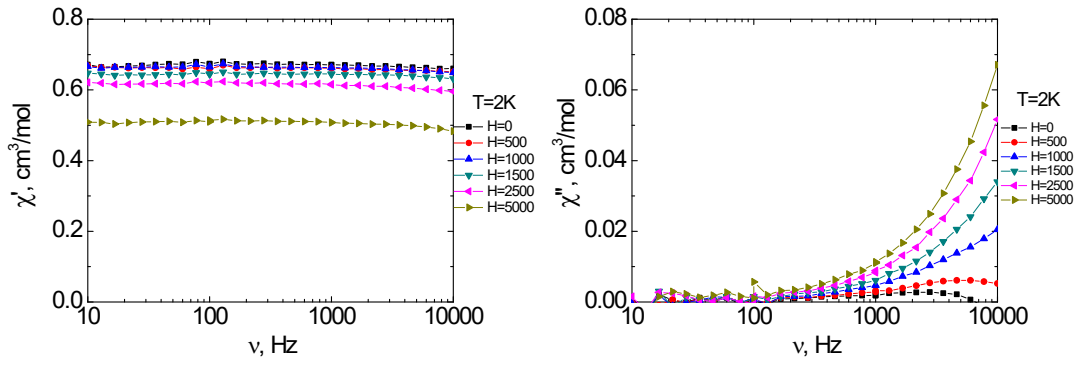

**Fig. S7.** Frequency dependencies of real,  $\chi'$  (left) and imaginary,  $\chi''$  (right) components of dynamic magnetic susceptibility for complex  $\mathbf{1}_{Yb}$  at  $T = 2$  K under various  $dc$  magnetic fields (Oe). Solid lines are visual guides.

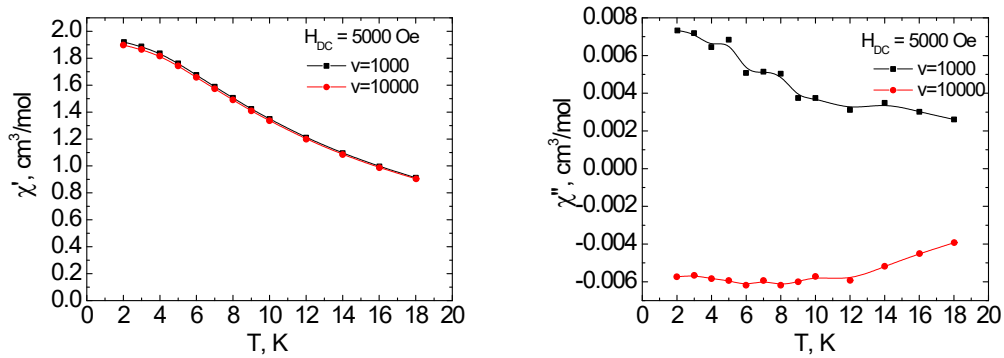

**Fig. S8.** Frequency dependencies of real,  $\chi'$  (left) and imaginary,  $\chi''$  (right) components of dynamic magnetic susceptibility for complex  $\mathbf{2}_{Tb}$  under  $H = 5000$  Oe at temperatures from 18 to 2 K. Solid lines are visual guides.

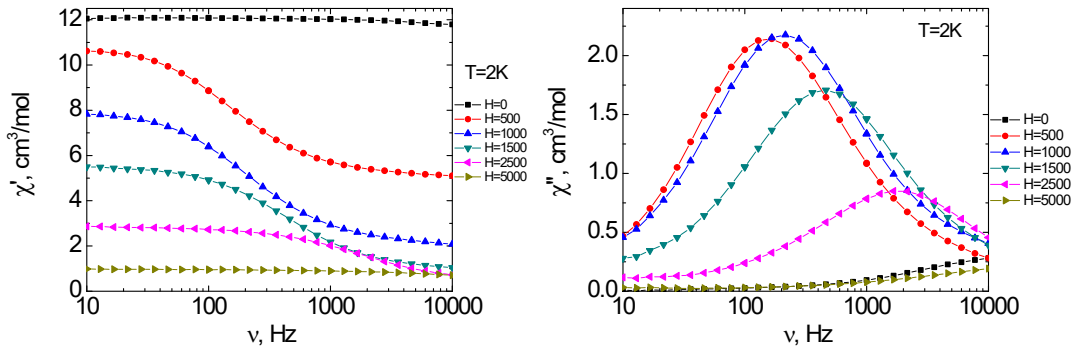

**Fig. S9.** Frequency dependencies of real,  $\chi'$  (left) and imaginary,  $\chi''$  (right) components of dynamic magnetic susceptibility for complex  $\mathbf{2}_{Dy}$  at  $T = 2$  K under various  $dc$  magnetic fields (Oe). Solid lines are visual guides.

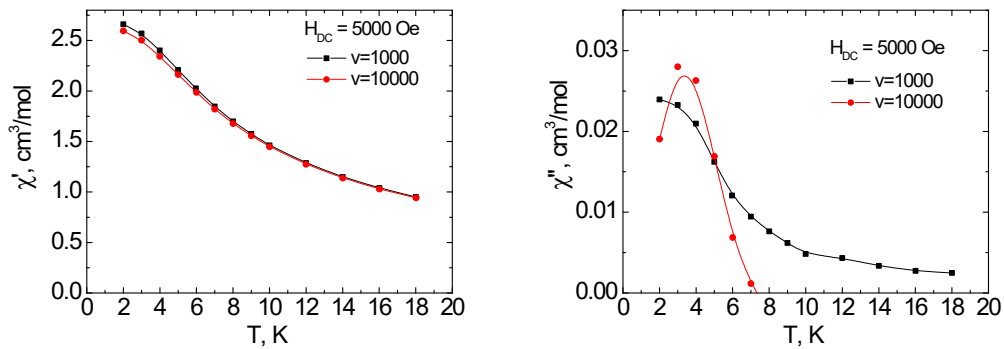

**Fig. S10.** Frequency dependencies of real,  $\chi'$  (left) and imaginary,  $\chi''$  (right) components of dynamic magnetic susceptibility for complex  $2_{H_0}$  under  $H = 5000$  Oe at temperatures from 18 to 2 K. Solid lines are visual guides.

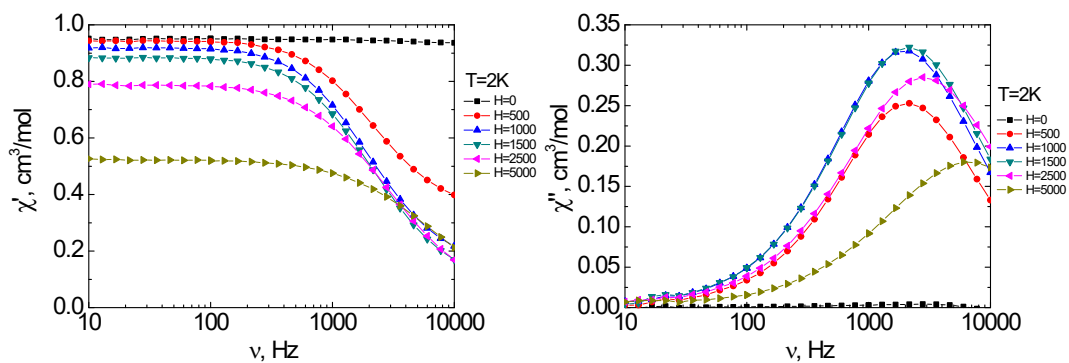

**Fig. S11.** Frequency dependencies of real,  $\chi'$  (left) and imaginary,  $\chi''$  (right) components of dynamic magnetic susceptibility for complex  $2_{Yb}$  at  $T = 2$  K under various  $dc$  magnetic fields (Oe). Solid lines are visual guides.

**Table S9.** Fitting of the  $\tau$  vs.  $T$  dependences for  $\mathbf{1}_{Dy}$ .

| Dependence of the relaxation time $\tau$ on the reciprocal temperature for $\mathbf{1}_{Dy}$ ( $H = 1500$ Oe, $T = 2-4.2$ K).                                                                                                                                                                                                                                                                                                                                                                                                                                                                                                                                                                                                                                                                                                                                                                                                                                                                                                                                                                                                                                                                                                                                                                                                                                                                                                                                                                                                                                                                                                                                                                                                                                                                                                                                                           | Fit function, temperature range, and the best-fit parameters with uncertainties. |                   |                |  |          |                                                          |  |  |                 |             |  |  |         |  |  |  |               |         |       |                |     |             |            |            |     |              |         |         |       |              |            |            |          |                                  |         |         |                 |                   |  |  |          |                                                          |  |  |                 |             |       |                |         |             |            |            |               |             |         |                |                                                                                                                                                                                                                                                                                                                                                                                                                                                                                                                                                    |          |            |            |     |              |         |          |     |   |         |          |     |   |         |         |                                                                                                                                                                                                                                                                                                                                                                                                                                                                                                                                                                                                                                                                                                                                                                            |
|-----------------------------------------------------------------------------------------------------------------------------------------------------------------------------------------------------------------------------------------------------------------------------------------------------------------------------------------------------------------------------------------------------------------------------------------------------------------------------------------------------------------------------------------------------------------------------------------------------------------------------------------------------------------------------------------------------------------------------------------------------------------------------------------------------------------------------------------------------------------------------------------------------------------------------------------------------------------------------------------------------------------------------------------------------------------------------------------------------------------------------------------------------------------------------------------------------------------------------------------------------------------------------------------------------------------------------------------------------------------------------------------------------------------------------------------------------------------------------------------------------------------------------------------------------------------------------------------------------------------------------------------------------------------------------------------------------------------------------------------------------------------------------------------------------------------------------------------------------------------------------------------|----------------------------------------------------------------------------------|-------------------|----------------|--|----------|----------------------------------------------------------|--|--|-----------------|-------------|--|--|---------|--|--|--|---------------|---------|-------|----------------|-----|-------------|------------|------------|-----|--------------|---------|---------|-------|--------------|------------|------------|----------|----------------------------------|---------|---------|-----------------|-------------------|--|--|----------|----------------------------------------------------------|--|--|-----------------|-------------|-------|----------------|---------|-------------|------------|------------|---------------|-------------|---------|----------------|----------------------------------------------------------------------------------------------------------------------------------------------------------------------------------------------------------------------------------------------------------------------------------------------------------------------------------------------------------------------------------------------------------------------------------------------------------------------------------------------------------------------------------------------------|----------|------------|------------|-----|--------------|---------|----------|-----|---|---------|----------|-----|---|---------|---------|----------------------------------------------------------------------------------------------------------------------------------------------------------------------------------------------------------------------------------------------------------------------------------------------------------------------------------------------------------------------------------------------------------------------------------------------------------------------------------------------------------------------------------------------------------------------------------------------------------------------------------------------------------------------------------------------------------------------------------------------------------------------------|
| <p style="text-align: center;"><math>H_{DC} = 1500</math> Oe</p> 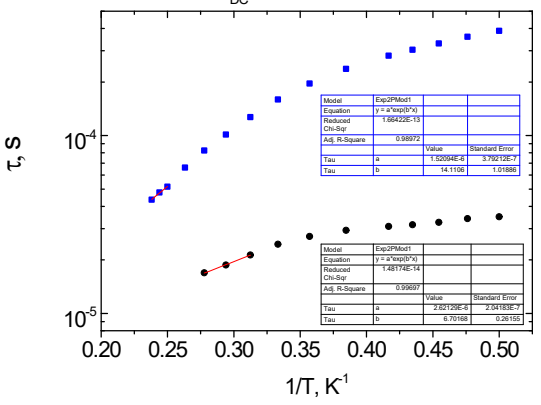 <table border="1" data-bbox="518 425 726 526"> <thead> <tr> <th>Model</th> <th>Exp2Model1</th> <th></th> <th></th> </tr> </thead> <tbody> <tr> <td>Equation</td> <td><math>\tau = a \cdot \exp(b/T)</math></td> <td></td> <td></td> </tr> <tr> <td>Reduced Chi-Sqr</td> <td>1.68422E-13</td> <td></td> <td></td> </tr> <tr> <td>Chi-Sqr</td> <td></td> <td></td> <td></td> </tr> <tr> <td>Adj. R-Square</td> <td>0.98972</td> <td>Value</td> <td>Standard Error</td> </tr> <tr> <td>Tau</td> <td>a</td> <td>1.50020E-6</td> <td>3.70029E-7</td> </tr> <tr> <td>Tau</td> <td>b</td> <td>14.1106</td> <td>1.01886</td> </tr> </tbody> </table> <table border="1" data-bbox="518 571 726 672"> <thead> <tr> <th>Model</th> <th>Exp2Model1</th> <th></th> <th></th> </tr> </thead> <tbody> <tr> <td>Equation</td> <td><math>\tau = a \cdot \exp(b/T)</math></td> <td></td> <td></td> </tr> <tr> <td>Reduced Chi-Sqr</td> <td>1.48174E-14</td> <td></td> <td></td> </tr> <tr> <td>Chi-Sqr</td> <td></td> <td></td> <td></td> </tr> <tr> <td>Adj. R-Square</td> <td>0.99697</td> <td>Value</td> <td>Standard Error</td> </tr> <tr> <td>Tau</td> <td>a</td> <td>2.62128E-6</td> <td>2.04138E-7</td> </tr> <tr> <td>Tau</td> <td>b</td> <td>6.10198</td> <td>0.201152</td> </tr> </tbody> </table>                                                                                                                                                                                                                                                                                                                                                                                                                                           | Model                                                                            | Exp2Model1        |                |  | Equation | $\tau = a \cdot \exp(b/T)$                               |  |  | Reduced Chi-Sqr | 1.68422E-13 |  |  | Chi-Sqr |  |  |  | Adj. R-Square | 0.98972 | Value | Standard Error | Tau | a           | 1.50020E-6 | 3.70029E-7 | Tau | b            | 14.1106 | 1.01886 | Model | Exp2Model1   |            |            | Equation | $\tau = a \cdot \exp(b/T)$       |         |         | Reduced Chi-Sqr | 1.48174E-14       |  |  | Chi-Sqr  |                                                          |  |  | Adj. R-Square   | 0.99697     | Value | Standard Error | Tau     | a           | 2.62128E-6 | 2.04138E-7 | Tau           | b           | 6.10198 | 0.201152       | <p><b>Orbach</b><br/> <math>\tau = \tau_0 \cdot \exp\{\Delta E/kT\}</math></p> <p><i>Slow relaxation process (blue dots)</i></p> <p><math>T = 4-4.2</math> K<br/> <math>\Delta E/k = 14 \pm 1</math> K<br/> <math>\tau_0 = 1.5 \cdot 10^{-6} \pm 4 \cdot 10^{-7}</math> s<br/> <math>R^2 = 0.98972</math></p> <p><i>Fast relaxation process (black dots)</i></p> <p><math>T = 3.2-3.6</math> K<br/> <math>\Delta E/k = 6.7 \pm 0.3</math> K<br/> <math>\tau_0 = 2.6 \cdot 10^{-6} \pm 2 \cdot 10^{-7}</math> s<br/> <math>R^2 = 0.99697</math></p> |          |            |            |     |              |         |          |     |   |         |          |     |   |         |         |                                                                                                                                                                                                                                                                                                                                                                                                                                                                                                                                                                                                                                                                                                                                                                            |
| Model                                                                                                                                                                                                                                                                                                                                                                                                                                                                                                                                                                                                                                                                                                                                                                                                                                                                                                                                                                                                                                                                                                                                                                                                                                                                                                                                                                                                                                                                                                                                                                                                                                                                                                                                                                                                                                                                                   | Exp2Model1                                                                       |                   |                |  |          |                                                          |  |  |                 |             |  |  |         |  |  |  |               |         |       |                |     |             |            |            |     |              |         |         |       |              |            |            |          |                                  |         |         |                 |                   |  |  |          |                                                          |  |  |                 |             |       |                |         |             |            |            |               |             |         |                |                                                                                                                                                                                                                                                                                                                                                                                                                                                                                                                                                    |          |            |            |     |              |         |          |     |   |         |          |     |   |         |         |                                                                                                                                                                                                                                                                                                                                                                                                                                                                                                                                                                                                                                                                                                                                                                            |
| Equation                                                                                                                                                                                                                                                                                                                                                                                                                                                                                                                                                                                                                                                                                                                                                                                                                                                                                                                                                                                                                                                                                                                                                                                                                                                                                                                                                                                                                                                                                                                                                                                                                                                                                                                                                                                                                                                                                | $\tau = a \cdot \exp(b/T)$                                                       |                   |                |  |          |                                                          |  |  |                 |             |  |  |         |  |  |  |               |         |       |                |     |             |            |            |     |              |         |         |       |              |            |            |          |                                  |         |         |                 |                   |  |  |          |                                                          |  |  |                 |             |       |                |         |             |            |            |               |             |         |                |                                                                                                                                                                                                                                                                                                                                                                                                                                                                                                                                                    |          |            |            |     |              |         |          |     |   |         |          |     |   |         |         |                                                                                                                                                                                                                                                                                                                                                                                                                                                                                                                                                                                                                                                                                                                                                                            |
| Reduced Chi-Sqr                                                                                                                                                                                                                                                                                                                                                                                                                                                                                                                                                                                                                                                                                                                                                                                                                                                                                                                                                                                                                                                                                                                                                                                                                                                                                                                                                                                                                                                                                                                                                                                                                                                                                                                                                                                                                                                                         | 1.68422E-13                                                                      |                   |                |  |          |                                                          |  |  |                 |             |  |  |         |  |  |  |               |         |       |                |     |             |            |            |     |              |         |         |       |              |            |            |          |                                  |         |         |                 |                   |  |  |          |                                                          |  |  |                 |             |       |                |         |             |            |            |               |             |         |                |                                                                                                                                                                                                                                                                                                                                                                                                                                                                                                                                                    |          |            |            |     |              |         |          |     |   |         |          |     |   |         |         |                                                                                                                                                                                                                                                                                                                                                                                                                                                                                                                                                                                                                                                                                                                                                                            |
| Chi-Sqr                                                                                                                                                                                                                                                                                                                                                                                                                                                                                                                                                                                                                                                                                                                                                                                                                                                                                                                                                                                                                                                                                                                                                                                                                                                                                                                                                                                                                                                                                                                                                                                                                                                                                                                                                                                                                                                                                 |                                                                                  |                   |                |  |          |                                                          |  |  |                 |             |  |  |         |  |  |  |               |         |       |                |     |             |            |            |     |              |         |         |       |              |            |            |          |                                  |         |         |                 |                   |  |  |          |                                                          |  |  |                 |             |       |                |         |             |            |            |               |             |         |                |                                                                                                                                                                                                                                                                                                                                                                                                                                                                                                                                                    |          |            |            |     |              |         |          |     |   |         |          |     |   |         |         |                                                                                                                                                                                                                                                                                                                                                                                                                                                                                                                                                                                                                                                                                                                                                                            |
| Adj. R-Square                                                                                                                                                                                                                                                                                                                                                                                                                                                                                                                                                                                                                                                                                                                                                                                                                                                                                                                                                                                                                                                                                                                                                                                                                                                                                                                                                                                                                                                                                                                                                                                                                                                                                                                                                                                                                                                                           | 0.98972                                                                          | Value             | Standard Error |  |          |                                                          |  |  |                 |             |  |  |         |  |  |  |               |         |       |                |     |             |            |            |     |              |         |         |       |              |            |            |          |                                  |         |         |                 |                   |  |  |          |                                                          |  |  |                 |             |       |                |         |             |            |            |               |             |         |                |                                                                                                                                                                                                                                                                                                                                                                                                                                                                                                                                                    |          |            |            |     |              |         |          |     |   |         |          |     |   |         |         |                                                                                                                                                                                                                                                                                                                                                                                                                                                                                                                                                                                                                                                                                                                                                                            |
| Tau                                                                                                                                                                                                                                                                                                                                                                                                                                                                                                                                                                                                                                                                                                                                                                                                                                                                                                                                                                                                                                                                                                                                                                                                                                                                                                                                                                                                                                                                                                                                                                                                                                                                                                                                                                                                                                                                                     | a                                                                                | 1.50020E-6        | 3.70029E-7     |  |          |                                                          |  |  |                 |             |  |  |         |  |  |  |               |         |       |                |     |             |            |            |     |              |         |         |       |              |            |            |          |                                  |         |         |                 |                   |  |  |          |                                                          |  |  |                 |             |       |                |         |             |            |            |               |             |         |                |                                                                                                                                                                                                                                                                                                                                                                                                                                                                                                                                                    |          |            |            |     |              |         |          |     |   |         |          |     |   |         |         |                                                                                                                                                                                                                                                                                                                                                                                                                                                                                                                                                                                                                                                                                                                                                                            |
| Tau                                                                                                                                                                                                                                                                                                                                                                                                                                                                                                                                                                                                                                                                                                                                                                                                                                                                                                                                                                                                                                                                                                                                                                                                                                                                                                                                                                                                                                                                                                                                                                                                                                                                                                                                                                                                                                                                                     | b                                                                                | 14.1106           | 1.01886        |  |          |                                                          |  |  |                 |             |  |  |         |  |  |  |               |         |       |                |     |             |            |            |     |              |         |         |       |              |            |            |          |                                  |         |         |                 |                   |  |  |          |                                                          |  |  |                 |             |       |                |         |             |            |            |               |             |         |                |                                                                                                                                                                                                                                                                                                                                                                                                                                                                                                                                                    |          |            |            |     |              |         |          |     |   |         |          |     |   |         |         |                                                                                                                                                                                                                                                                                                                                                                                                                                                                                                                                                                                                                                                                                                                                                                            |
| Model                                                                                                                                                                                                                                                                                                                                                                                                                                                                                                                                                                                                                                                                                                                                                                                                                                                                                                                                                                                                                                                                                                                                                                                                                                                                                                                                                                                                                                                                                                                                                                                                                                                                                                                                                                                                                                                                                   | Exp2Model1                                                                       |                   |                |  |          |                                                          |  |  |                 |             |  |  |         |  |  |  |               |         |       |                |     |             |            |            |     |              |         |         |       |              |            |            |          |                                  |         |         |                 |                   |  |  |          |                                                          |  |  |                 |             |       |                |         |             |            |            |               |             |         |                |                                                                                                                                                                                                                                                                                                                                                                                                                                                                                                                                                    |          |            |            |     |              |         |          |     |   |         |          |     |   |         |         |                                                                                                                                                                                                                                                                                                                                                                                                                                                                                                                                                                                                                                                                                                                                                                            |
| Equation                                                                                                                                                                                                                                                                                                                                                                                                                                                                                                                                                                                                                                                                                                                                                                                                                                                                                                                                                                                                                                                                                                                                                                                                                                                                                                                                                                                                                                                                                                                                                                                                                                                                                                                                                                                                                                                                                | $\tau = a \cdot \exp(b/T)$                                                       |                   |                |  |          |                                                          |  |  |                 |             |  |  |         |  |  |  |               |         |       |                |     |             |            |            |     |              |         |         |       |              |            |            |          |                                  |         |         |                 |                   |  |  |          |                                                          |  |  |                 |             |       |                |         |             |            |            |               |             |         |                |                                                                                                                                                                                                                                                                                                                                                                                                                                                                                                                                                    |          |            |            |     |              |         |          |     |   |         |          |     |   |         |         |                                                                                                                                                                                                                                                                                                                                                                                                                                                                                                                                                                                                                                                                                                                                                                            |
| Reduced Chi-Sqr                                                                                                                                                                                                                                                                                                                                                                                                                                                                                                                                                                                                                                                                                                                                                                                                                                                                                                                                                                                                                                                                                                                                                                                                                                                                                                                                                                                                                                                                                                                                                                                                                                                                                                                                                                                                                                                                         | 1.48174E-14                                                                      |                   |                |  |          |                                                          |  |  |                 |             |  |  |         |  |  |  |               |         |       |                |     |             |            |            |     |              |         |         |       |              |            |            |          |                                  |         |         |                 |                   |  |  |          |                                                          |  |  |                 |             |       |                |         |             |            |            |               |             |         |                |                                                                                                                                                                                                                                                                                                                                                                                                                                                                                                                                                    |          |            |            |     |              |         |          |     |   |         |          |     |   |         |         |                                                                                                                                                                                                                                                                                                                                                                                                                                                                                                                                                                                                                                                                                                                                                                            |
| Chi-Sqr                                                                                                                                                                                                                                                                                                                                                                                                                                                                                                                                                                                                                                                                                                                                                                                                                                                                                                                                                                                                                                                                                                                                                                                                                                                                                                                                                                                                                                                                                                                                                                                                                                                                                                                                                                                                                                                                                 |                                                                                  |                   |                |  |          |                                                          |  |  |                 |             |  |  |         |  |  |  |               |         |       |                |     |             |            |            |     |              |         |         |       |              |            |            |          |                                  |         |         |                 |                   |  |  |          |                                                          |  |  |                 |             |       |                |         |             |            |            |               |             |         |                |                                                                                                                                                                                                                                                                                                                                                                                                                                                                                                                                                    |          |            |            |     |              |         |          |     |   |         |          |     |   |         |         |                                                                                                                                                                                                                                                                                                                                                                                                                                                                                                                                                                                                                                                                                                                                                                            |
| Adj. R-Square                                                                                                                                                                                                                                                                                                                                                                                                                                                                                                                                                                                                                                                                                                                                                                                                                                                                                                                                                                                                                                                                                                                                                                                                                                                                                                                                                                                                                                                                                                                                                                                                                                                                                                                                                                                                                                                                           | 0.99697                                                                          | Value             | Standard Error |  |          |                                                          |  |  |                 |             |  |  |         |  |  |  |               |         |       |                |     |             |            |            |     |              |         |         |       |              |            |            |          |                                  |         |         |                 |                   |  |  |          |                                                          |  |  |                 |             |       |                |         |             |            |            |               |             |         |                |                                                                                                                                                                                                                                                                                                                                                                                                                                                                                                                                                    |          |            |            |     |              |         |          |     |   |         |          |     |   |         |         |                                                                                                                                                                                                                                                                                                                                                                                                                                                                                                                                                                                                                                                                                                                                                                            |
| Tau                                                                                                                                                                                                                                                                                                                                                                                                                                                                                                                                                                                                                                                                                                                                                                                                                                                                                                                                                                                                                                                                                                                                                                                                                                                                                                                                                                                                                                                                                                                                                                                                                                                                                                                                                                                                                                                                                     | a                                                                                | 2.62128E-6        | 2.04138E-7     |  |          |                                                          |  |  |                 |             |  |  |         |  |  |  |               |         |       |                |     |             |            |            |     |              |         |         |       |              |            |            |          |                                  |         |         |                 |                   |  |  |          |                                                          |  |  |                 |             |       |                |         |             |            |            |               |             |         |                |                                                                                                                                                                                                                                                                                                                                                                                                                                                                                                                                                    |          |            |            |     |              |         |          |     |   |         |          |     |   |         |         |                                                                                                                                                                                                                                                                                                                                                                                                                                                                                                                                                                                                                                                                                                                                                                            |
| Tau                                                                                                                                                                                                                                                                                                                                                                                                                                                                                                                                                                                                                                                                                                                                                                                                                                                                                                                                                                                                                                                                                                                                                                                                                                                                                                                                                                                                                                                                                                                                                                                                                                                                                                                                                                                                                                                                                     | b                                                                                | 6.10198           | 0.201152       |  |          |                                                          |  |  |                 |             |  |  |         |  |  |  |               |         |       |                |     |             |            |            |     |              |         |         |       |              |            |            |          |                                  |         |         |                 |                   |  |  |          |                                                          |  |  |                 |             |       |                |         |             |            |            |               |             |         |                |                                                                                                                                                                                                                                                                                                                                                                                                                                                                                                                                                    |          |            |            |     |              |         |          |     |   |         |          |     |   |         |         |                                                                                                                                                                                                                                                                                                                                                                                                                                                                                                                                                                                                                                                                                                                                                                            |
| <p style="text-align: center;"><math>H_{DC} = 1500</math> Oe</p>  <table border="1" data-bbox="630 1064 821 1187"> <thead> <tr> <th>Model</th> <th>Orbach_QTM (User)</th> <th></th> <th></th> </tr> </thead> <tbody> <tr> <td>Equation</td> <td><math>\tau^{-1} = \tau_0^{-1} \cdot \exp\{-\Delta E/kT\} + B</math></td> <td></td> <td></td> </tr> <tr> <td>Reduced Chi-Sqr</td> <td>3.84888E-11</td> <td></td> <td></td> </tr> <tr> <td>Chi-Sqr</td> <td></td> <td></td> <td></td> </tr> <tr> <td>Adj. R-Square</td> <td>0.99971</td> <td>Value</td> <td>Standard Error</td> </tr> <tr> <td>Tau</td> <td><math>\tau_0</math></td> <td>2.00333E-6</td> <td>62.912</td> </tr> <tr> <td>Tau</td> <td><math>\Delta E/k</math></td> <td>0</td> <td>0</td> </tr> <tr> <td>Tau</td> <td>B</td> <td>1.48028E-4</td> <td>3.79812E-7</td> </tr> <tr> <td>Tau</td> <td>n</td> <td>1.00000</td> <td>0.00000</td> </tr> </tbody> </table> <table border="1" data-bbox="614 1232 821 1332"> <thead> <tr> <th>Model</th> <th>Orbach_QTM (User)</th> <th></th> <th></th> </tr> </thead> <tbody> <tr> <td>Equation</td> <td><math>\tau^{-1} = \tau_0^{-1} \cdot \exp\{-\Delta E/kT\} + B</math></td> <td></td> <td></td> </tr> <tr> <td>Reduced Chi-Sqr</td> <td>1.48174E-14</td> <td></td> <td></td> </tr> <tr> <td>Chi-Sqr</td> <td></td> <td></td> <td></td> </tr> <tr> <td>Adj. R-Square</td> <td>0.99697</td> <td>Value</td> <td>Standard Error</td> </tr> <tr> <td>Tau</td> <td><math>\tau_0</math></td> <td>2.62128E-6</td> <td>2.04138E-7</td> </tr> <tr> <td>Tau</td> <td><math>\Delta E/k</math></td> <td>6.70198</td> <td>0.201152</td> </tr> <tr> <td>Tau</td> <td>B</td> <td>6.10198</td> <td>0.201152</td> </tr> <tr> <td>Tau</td> <td>n</td> <td>1.00000</td> <td>0.00000</td> </tr> </tbody> </table> | Model                                                                            | Orbach_QTM (User) |                |  | Equation | $\tau^{-1} = \tau_0^{-1} \cdot \exp\{-\Delta E/kT\} + B$ |  |  | Reduced Chi-Sqr | 3.84888E-11 |  |  | Chi-Sqr |  |  |  | Adj. R-Square | 0.99971 | Value | Standard Error | Tau | $\tau_0$    | 2.00333E-6 | 62.912     | Tau | $\Delta E/k$ | 0       | 0       | Tau   | B            | 1.48028E-4 | 3.79812E-7 | Tau      | n                                | 1.00000 | 0.00000 | Model           | Orbach_QTM (User) |  |  | Equation | $\tau^{-1} = \tau_0^{-1} \cdot \exp\{-\Delta E/kT\} + B$ |  |  | Reduced Chi-Sqr | 1.48174E-14 |       |                | Chi-Sqr |             |            |            | Adj. R-Square | 0.99697     | Value   | Standard Error | Tau                                                                                                                                                                                                                                                                                                                                                                                                                                                                                                                                                | $\tau_0$ | 2.62128E-6 | 2.04138E-7 | Tau | $\Delta E/k$ | 6.70198 | 0.201152 | Tau | B | 6.10198 | 0.201152 | Tau | n | 1.00000 | 0.00000 | <p><i>Slow relaxation process (blue dots)</i></p> <p><b>Orbach+ QTM</b><br/> <math>\tau^{-1} = \tau_0^{-1} \cdot \exp\{-\Delta E/kT\} + B</math></p> <p><math>T = 2-4.2</math> K<br/> <math>\Delta E/k = 15.2 \pm 0.6</math> K<br/> <math>\tau_0 = 1.5 \cdot 10^{-6} \pm 3 \cdot 10^{-7}</math> s<br/> <math>B = 2304 \pm 63</math> s<sup>-1</sup><br/> <math>R^2 = 0.99772</math></p> <p><i>Fast relaxation process (black dots)</i></p> <p><b>Orbach+ QTM</b><br/> <math>\tau^{-1} = \tau_0^{-1} \cdot \exp\{-\Delta E/kT\} + B</math></p> <p><math>T = 2-3.6</math> K<br/> <math>\Delta E/k = 15 \pm 1</math> K<br/> <math>\tau_0 = 5 \cdot 10^{-7} \pm 2 \cdot 10^{-7}</math> s<br/> <math>B = 27959 \pm 530</math> s<sup>-1</sup><br/> <math>R^2 = 0.99314</math></p> |
| Model                                                                                                                                                                                                                                                                                                                                                                                                                                                                                                                                                                                                                                                                                                                                                                                                                                                                                                                                                                                                                                                                                                                                                                                                                                                                                                                                                                                                                                                                                                                                                                                                                                                                                                                                                                                                                                                                                   | Orbach_QTM (User)                                                                |                   |                |  |          |                                                          |  |  |                 |             |  |  |         |  |  |  |               |         |       |                |     |             |            |            |     |              |         |         |       |              |            |            |          |                                  |         |         |                 |                   |  |  |          |                                                          |  |  |                 |             |       |                |         |             |            |            |               |             |         |                |                                                                                                                                                                                                                                                                                                                                                                                                                                                                                                                                                    |          |            |            |     |              |         |          |     |   |         |          |     |   |         |         |                                                                                                                                                                                                                                                                                                                                                                                                                                                                                                                                                                                                                                                                                                                                                                            |
| Equation                                                                                                                                                                                                                                                                                                                                                                                                                                                                                                                                                                                                                                                                                                                                                                                                                                                                                                                                                                                                                                                                                                                                                                                                                                                                                                                                                                                                                                                                                                                                                                                                                                                                                                                                                                                                                                                                                | $\tau^{-1} = \tau_0^{-1} \cdot \exp\{-\Delta E/kT\} + B$                         |                   |                |  |          |                                                          |  |  |                 |             |  |  |         |  |  |  |               |         |       |                |     |             |            |            |     |              |         |         |       |              |            |            |          |                                  |         |         |                 |                   |  |  |          |                                                          |  |  |                 |             |       |                |         |             |            |            |               |             |         |                |                                                                                                                                                                                                                                                                                                                                                                                                                                                                                                                                                    |          |            |            |     |              |         |          |     |   |         |          |     |   |         |         |                                                                                                                                                                                                                                                                                                                                                                                                                                                                                                                                                                                                                                                                                                                                                                            |
| Reduced Chi-Sqr                                                                                                                                                                                                                                                                                                                                                                                                                                                                                                                                                                                                                                                                                                                                                                                                                                                                                                                                                                                                                                                                                                                                                                                                                                                                                                                                                                                                                                                                                                                                                                                                                                                                                                                                                                                                                                                                         | 3.84888E-11                                                                      |                   |                |  |          |                                                          |  |  |                 |             |  |  |         |  |  |  |               |         |       |                |     |             |            |            |     |              |         |         |       |              |            |            |          |                                  |         |         |                 |                   |  |  |          |                                                          |  |  |                 |             |       |                |         |             |            |            |               |             |         |                |                                                                                                                                                                                                                                                                                                                                                                                                                                                                                                                                                    |          |            |            |     |              |         |          |     |   |         |          |     |   |         |         |                                                                                                                                                                                                                                                                                                                                                                                                                                                                                                                                                                                                                                                                                                                                                                            |
| Chi-Sqr                                                                                                                                                                                                                                                                                                                                                                                                                                                                                                                                                                                                                                                                                                                                                                                                                                                                                                                                                                                                                                                                                                                                                                                                                                                                                                                                                                                                                                                                                                                                                                                                                                                                                                                                                                                                                                                                                 |                                                                                  |                   |                |  |          |                                                          |  |  |                 |             |  |  |         |  |  |  |               |         |       |                |     |             |            |            |     |              |         |         |       |              |            |            |          |                                  |         |         |                 |                   |  |  |          |                                                          |  |  |                 |             |       |                |         |             |            |            |               |             |         |                |                                                                                                                                                                                                                                                                                                                                                                                                                                                                                                                                                    |          |            |            |     |              |         |          |     |   |         |          |     |   |         |         |                                                                                                                                                                                                                                                                                                                                                                                                                                                                                                                                                                                                                                                                                                                                                                            |
| Adj. R-Square                                                                                                                                                                                                                                                                                                                                                                                                                                                                                                                                                                                                                                                                                                                                                                                                                                                                                                                                                                                                                                                                                                                                                                                                                                                                                                                                                                                                                                                                                                                                                                                                                                                                                                                                                                                                                                                                           | 0.99971                                                                          | Value             | Standard Error |  |          |                                                          |  |  |                 |             |  |  |         |  |  |  |               |         |       |                |     |             |            |            |     |              |         |         |       |              |            |            |          |                                  |         |         |                 |                   |  |  |          |                                                          |  |  |                 |             |       |                |         |             |            |            |               |             |         |                |                                                                                                                                                                                                                                                                                                                                                                                                                                                                                                                                                    |          |            |            |     |              |         |          |     |   |         |          |     |   |         |         |                                                                                                                                                                                                                                                                                                                                                                                                                                                                                                                                                                                                                                                                                                                                                                            |
| Tau                                                                                                                                                                                                                                                                                                                                                                                                                                                                                                                                                                                                                                                                                                                                                                                                                                                                                                                                                                                                                                                                                                                                                                                                                                                                                                                                                                                                                                                                                                                                                                                                                                                                                                                                                                                                                                                                                     | $\tau_0$                                                                         | 2.00333E-6        | 62.912         |  |          |                                                          |  |  |                 |             |  |  |         |  |  |  |               |         |       |                |     |             |            |            |     |              |         |         |       |              |            |            |          |                                  |         |         |                 |                   |  |  |          |                                                          |  |  |                 |             |       |                |         |             |            |            |               |             |         |                |                                                                                                                                                                                                                                                                                                                                                                                                                                                                                                                                                    |          |            |            |     |              |         |          |     |   |         |          |     |   |         |         |                                                                                                                                                                                                                                                                                                                                                                                                                                                                                                                                                                                                                                                                                                                                                                            |
| Tau                                                                                                                                                                                                                                                                                                                                                                                                                                                                                                                                                                                                                                                                                                                                                                                                                                                                                                                                                                                                                                                                                                                                                                                                                                                                                                                                                                                                                                                                                                                                                                                                                                                                                                                                                                                                                                                                                     | $\Delta E/k$                                                                     | 0                 | 0              |  |          |                                                          |  |  |                 |             |  |  |         |  |  |  |               |         |       |                |     |             |            |            |     |              |         |         |       |              |            |            |          |                                  |         |         |                 |                   |  |  |          |                                                          |  |  |                 |             |       |                |         |             |            |            |               |             |         |                |                                                                                                                                                                                                                                                                                                                                                                                                                                                                                                                                                    |          |            |            |     |              |         |          |     |   |         |          |     |   |         |         |                                                                                                                                                                                                                                                                                                                                                                                                                                                                                                                                                                                                                                                                                                                                                                            |
| Tau                                                                                                                                                                                                                                                                                                                                                                                                                                                                                                                                                                                                                                                                                                                                                                                                                                                                                                                                                                                                                                                                                                                                                                                                                                                                                                                                                                                                                                                                                                                                                                                                                                                                                                                                                                                                                                                                                     | B                                                                                | 1.48028E-4        | 3.79812E-7     |  |          |                                                          |  |  |                 |             |  |  |         |  |  |  |               |         |       |                |     |             |            |            |     |              |         |         |       |              |            |            |          |                                  |         |         |                 |                   |  |  |          |                                                          |  |  |                 |             |       |                |         |             |            |            |               |             |         |                |                                                                                                                                                                                                                                                                                                                                                                                                                                                                                                                                                    |          |            |            |     |              |         |          |     |   |         |          |     |   |         |         |                                                                                                                                                                                                                                                                                                                                                                                                                                                                                                                                                                                                                                                                                                                                                                            |
| Tau                                                                                                                                                                                                                                                                                                                                                                                                                                                                                                                                                                                                                                                                                                                                                                                                                                                                                                                                                                                                                                                                                                                                                                                                                                                                                                                                                                                                                                                                                                                                                                                                                                                                                                                                                                                                                                                                                     | n                                                                                | 1.00000           | 0.00000        |  |          |                                                          |  |  |                 |             |  |  |         |  |  |  |               |         |       |                |     |             |            |            |     |              |         |         |       |              |            |            |          |                                  |         |         |                 |                   |  |  |          |                                                          |  |  |                 |             |       |                |         |             |            |            |               |             |         |                |                                                                                                                                                                                                                                                                                                                                                                                                                                                                                                                                                    |          |            |            |     |              |         |          |     |   |         |          |     |   |         |         |                                                                                                                                                                                                                                                                                                                                                                                                                                                                                                                                                                                                                                                                                                                                                                            |
| Model                                                                                                                                                                                                                                                                                                                                                                                                                                                                                                                                                                                                                                                                                                                                                                                                                                                                                                                                                                                                                                                                                                                                                                                                                                                                                                                                                                                                                                                                                                                                                                                                                                                                                                                                                                                                                                                                                   | Orbach_QTM (User)                                                                |                   |                |  |          |                                                          |  |  |                 |             |  |  |         |  |  |  |               |         |       |                |     |             |            |            |     |              |         |         |       |              |            |            |          |                                  |         |         |                 |                   |  |  |          |                                                          |  |  |                 |             |       |                |         |             |            |            |               |             |         |                |                                                                                                                                                                                                                                                                                                                                                                                                                                                                                                                                                    |          |            |            |     |              |         |          |     |   |         |          |     |   |         |         |                                                                                                                                                                                                                                                                                                                                                                                                                                                                                                                                                                                                                                                                                                                                                                            |
| Equation                                                                                                                                                                                                                                                                                                                                                                                                                                                                                                                                                                                                                                                                                                                                                                                                                                                                                                                                                                                                                                                                                                                                                                                                                                                                                                                                                                                                                                                                                                                                                                                                                                                                                                                                                                                                                                                                                | $\tau^{-1} = \tau_0^{-1} \cdot \exp\{-\Delta E/kT\} + B$                         |                   |                |  |          |                                                          |  |  |                 |             |  |  |         |  |  |  |               |         |       |                |     |             |            |            |     |              |         |         |       |              |            |            |          |                                  |         |         |                 |                   |  |  |          |                                                          |  |  |                 |             |       |                |         |             |            |            |               |             |         |                |                                                                                                                                                                                                                                                                                                                                                                                                                                                                                                                                                    |          |            |            |     |              |         |          |     |   |         |          |     |   |         |         |                                                                                                                                                                                                                                                                                                                                                                                                                                                                                                                                                                                                                                                                                                                                                                            |
| Reduced Chi-Sqr                                                                                                                                                                                                                                                                                                                                                                                                                                                                                                                                                                                                                                                                                                                                                                                                                                                                                                                                                                                                                                                                                                                                                                                                                                                                                                                                                                                                                                                                                                                                                                                                                                                                                                                                                                                                                                                                         | 1.48174E-14                                                                      |                   |                |  |          |                                                          |  |  |                 |             |  |  |         |  |  |  |               |         |       |                |     |             |            |            |     |              |         |         |       |              |            |            |          |                                  |         |         |                 |                   |  |  |          |                                                          |  |  |                 |             |       |                |         |             |            |            |               |             |         |                |                                                                                                                                                                                                                                                                                                                                                                                                                                                                                                                                                    |          |            |            |     |              |         |          |     |   |         |          |     |   |         |         |                                                                                                                                                                                                                                                                                                                                                                                                                                                                                                                                                                                                                                                                                                                                                                            |
| Chi-Sqr                                                                                                                                                                                                                                                                                                                                                                                                                                                                                                                                                                                                                                                                                                                                                                                                                                                                                                                                                                                                                                                                                                                                                                                                                                                                                                                                                                                                                                                                                                                                                                                                                                                                                                                                                                                                                                                                                 |                                                                                  |                   |                |  |          |                                                          |  |  |                 |             |  |  |         |  |  |  |               |         |       |                |     |             |            |            |     |              |         |         |       |              |            |            |          |                                  |         |         |                 |                   |  |  |          |                                                          |  |  |                 |             |       |                |         |             |            |            |               |             |         |                |                                                                                                                                                                                                                                                                                                                                                                                                                                                                                                                                                    |          |            |            |     |              |         |          |     |   |         |          |     |   |         |         |                                                                                                                                                                                                                                                                                                                                                                                                                                                                                                                                                                                                                                                                                                                                                                            |
| Adj. R-Square                                                                                                                                                                                                                                                                                                                                                                                                                                                                                                                                                                                                                                                                                                                                                                                                                                                                                                                                                                                                                                                                                                                                                                                                                                                                                                                                                                                                                                                                                                                                                                                                                                                                                                                                                                                                                                                                           | 0.99697                                                                          | Value             | Standard Error |  |          |                                                          |  |  |                 |             |  |  |         |  |  |  |               |         |       |                |     |             |            |            |     |              |         |         |       |              |            |            |          |                                  |         |         |                 |                   |  |  |          |                                                          |  |  |                 |             |       |                |         |             |            |            |               |             |         |                |                                                                                                                                                                                                                                                                                                                                                                                                                                                                                                                                                    |          |            |            |     |              |         |          |     |   |         |          |     |   |         |         |                                                                                                                                                                                                                                                                                                                                                                                                                                                                                                                                                                                                                                                                                                                                                                            |
| Tau                                                                                                                                                                                                                                                                                                                                                                                                                                                                                                                                                                                                                                                                                                                                                                                                                                                                                                                                                                                                                                                                                                                                                                                                                                                                                                                                                                                                                                                                                                                                                                                                                                                                                                                                                                                                                                                                                     | $\tau_0$                                                                         | 2.62128E-6        | 2.04138E-7     |  |          |                                                          |  |  |                 |             |  |  |         |  |  |  |               |         |       |                |     |             |            |            |     |              |         |         |       |              |            |            |          |                                  |         |         |                 |                   |  |  |          |                                                          |  |  |                 |             |       |                |         |             |            |            |               |             |         |                |                                                                                                                                                                                                                                                                                                                                                                                                                                                                                                                                                    |          |            |            |     |              |         |          |     |   |         |          |     |   |         |         |                                                                                                                                                                                                                                                                                                                                                                                                                                                                                                                                                                                                                                                                                                                                                                            |
| Tau                                                                                                                                                                                                                                                                                                                                                                                                                                                                                                                                                                                                                                                                                                                                                                                                                                                                                                                                                                                                                                                                                                                                                                                                                                                                                                                                                                                                                                                                                                                                                                                                                                                                                                                                                                                                                                                                                     | $\Delta E/k$                                                                     | 6.70198           | 0.201152       |  |          |                                                          |  |  |                 |             |  |  |         |  |  |  |               |         |       |                |     |             |            |            |     |              |         |         |       |              |            |            |          |                                  |         |         |                 |                   |  |  |          |                                                          |  |  |                 |             |       |                |         |             |            |            |               |             |         |                |                                                                                                                                                                                                                                                                                                                                                                                                                                                                                                                                                    |          |            |            |     |              |         |          |     |   |         |          |     |   |         |         |                                                                                                                                                                                                                                                                                                                                                                                                                                                                                                                                                                                                                                                                                                                                                                            |
| Tau                                                                                                                                                                                                                                                                                                                                                                                                                                                                                                                                                                                                                                                                                                                                                                                                                                                                                                                                                                                                                                                                                                                                                                                                                                                                                                                                                                                                                                                                                                                                                                                                                                                                                                                                                                                                                                                                                     | B                                                                                | 6.10198           | 0.201152       |  |          |                                                          |  |  |                 |             |  |  |         |  |  |  |               |         |       |                |     |             |            |            |     |              |         |         |       |              |            |            |          |                                  |         |         |                 |                   |  |  |          |                                                          |  |  |                 |             |       |                |         |             |            |            |               |             |         |                |                                                                                                                                                                                                                                                                                                                                                                                                                                                                                                                                                    |          |            |            |     |              |         |          |     |   |         |          |     |   |         |         |                                                                                                                                                                                                                                                                                                                                                                                                                                                                                                                                                                                                                                                                                                                                                                            |
| Tau                                                                                                                                                                                                                                                                                                                                                                                                                                                                                                                                                                                                                                                                                                                                                                                                                                                                                                                                                                                                                                                                                                                                                                                                                                                                                                                                                                                                                                                                                                                                                                                                                                                                                                                                                                                                                                                                                     | n                                                                                | 1.00000           | 0.00000        |  |          |                                                          |  |  |                 |             |  |  |         |  |  |  |               |         |       |                |     |             |            |            |     |              |         |         |       |              |            |            |          |                                  |         |         |                 |                   |  |  |          |                                                          |  |  |                 |             |       |                |         |             |            |            |               |             |         |                |                                                                                                                                                                                                                                                                                                                                                                                                                                                                                                                                                    |          |            |            |     |              |         |          |     |   |         |          |     |   |         |         |                                                                                                                                                                                                                                                                                                                                                                                                                                                                                                                                                                                                                                                                                                                                                                            |
| <p style="text-align: center;"><math>H_{DC} = 1500</math> Oe</p>  <table border="1" data-bbox="534 1821 742 1921"> <thead> <tr> <th>Model</th> <th>Raman (User)</th> <th></th> <th></th> </tr> </thead> <tbody> <tr> <td>Equation</td> <td><math>\tau = C_{Raman} T^{n_{Raman}}</math></td> <td></td> <td></td> </tr> <tr> <td>Reduced Chi-Sqr</td> <td>3.03246E-10</td> <td></td> <td></td> </tr> <tr> <td>Chi-Sqr</td> <td></td> <td></td> <td></td> </tr> <tr> <td>Adj. R-Square</td> <td>0.97982</td> <td>Value</td> <td>Standard Error</td> </tr> <tr> <td>Tau</td> <td><math>C_{Raman}</math></td> <td>418.28194</td> <td>44.91041</td> </tr> <tr> <td>Tau</td> <td><math>n_{Raman}</math></td> <td>2.53386</td> <td>0.12667</td> </tr> </tbody> </table> <table border="1" data-bbox="550 1966 742 2067"> <thead> <tr> <th>Model</th> <th>Raman (User)</th> <th></th> <th></th> </tr> </thead> <tbody> <tr> <td>Equation</td> <td><math>\tau = C_{Raman} T^{n_{Raman}}</math></td> <td></td> <td></td> </tr> <tr> <td>Reduced Chi-Sqr</td> <td>2.23403E-12</td> <td></td> <td></td> </tr> <tr> <td>Chi-Sqr</td> <td></td> <td></td> <td></td> </tr> <tr> <td>Adj. R-Square</td> <td>0.94304</td> <td>Value</td> <td>Standard Error</td> </tr> <tr> <td>Tau</td> <td><math>C_{Raman}</math></td> <td>12748</td> <td>1066.76023</td> </tr> <tr> <td>Tau</td> <td><math>n_{Raman}</math></td> <td>1.1031</td> <td>0.09171</td> </tr> </tbody> </table>                                                                                                                                                                                                                                                                                                                                           | Model                                                                            | Raman (User)      |                |  | Equation | $\tau = C_{Raman} T^{n_{Raman}}$                         |  |  | Reduced Chi-Sqr | 3.03246E-10 |  |  | Chi-Sqr |  |  |  | Adj. R-Square | 0.97982 | Value | Standard Error | Tau | $C_{Raman}$ | 418.28194  | 44.91041   | Tau | $n_{Raman}$  | 2.53386 | 0.12667 | Model | Raman (User) |            |            | Equation | $\tau = C_{Raman} T^{n_{Raman}}$ |         |         | Reduced Chi-Sqr | 2.23403E-12       |  |  | Chi-Sqr  |                                                          |  |  | Adj. R-Square   | 0.94304     | Value | Standard Error | Tau     | $C_{Raman}$ | 12748      | 1066.76023 | Tau           | $n_{Raman}$ | 1.1031  | 0.09171        | <p><i>Slow relaxation process (blue dots)</i></p> <p><b>Raman</b><br/> <math>\tau^{-1} = C_{Raman} T^{n_{Raman}}</math></p> <p><math>T = 2-4.2</math> K<br/> <math>C_{Raman} = 418 \pm 45</math> s<sup>-1</sup> K<sup>-n<sub>Raman</sub></sup><br/> <math>n_{Raman} = 2.5 \pm 0.1</math><br/> <math>R^2 = 0.97982</math></p>                                                                                                                                                                                                                       |          |            |            |     |              |         |          |     |   |         |          |     |   |         |         |                                                                                                                                                                                                                                                                                                                                                                                                                                                                                                                                                                                                                                                                                                                                                                            |
| Model                                                                                                                                                                                                                                                                                                                                                                                                                                                                                                                                                                                                                                                                                                                                                                                                                                                                                                                                                                                                                                                                                                                                                                                                                                                                                                                                                                                                                                                                                                                                                                                                                                                                                                                                                                                                                                                                                   | Raman (User)                                                                     |                   |                |  |          |                                                          |  |  |                 |             |  |  |         |  |  |  |               |         |       |                |     |             |            |            |     |              |         |         |       |              |            |            |          |                                  |         |         |                 |                   |  |  |          |                                                          |  |  |                 |             |       |                |         |             |            |            |               |             |         |                |                                                                                                                                                                                                                                                                                                                                                                                                                                                                                                                                                    |          |            |            |     |              |         |          |     |   |         |          |     |   |         |         |                                                                                                                                                                                                                                                                                                                                                                                                                                                                                                                                                                                                                                                                                                                                                                            |
| Equation                                                                                                                                                                                                                                                                                                                                                                                                                                                                                                                                                                                                                                                                                                                                                                                                                                                                                                                                                                                                                                                                                                                                                                                                                                                                                                                                                                                                                                                                                                                                                                                                                                                                                                                                                                                                                                                                                | $\tau = C_{Raman} T^{n_{Raman}}$                                                 |                   |                |  |          |                                                          |  |  |                 |             |  |  |         |  |  |  |               |         |       |                |     |             |            |            |     |              |         |         |       |              |            |            |          |                                  |         |         |                 |                   |  |  |          |                                                          |  |  |                 |             |       |                |         |             |            |            |               |             |         |                |                                                                                                                                                                                                                                                                                                                                                                                                                                                                                                                                                    |          |            |            |     |              |         |          |     |   |         |          |     |   |         |         |                                                                                                                                                                                                                                                                                                                                                                                                                                                                                                                                                                                                                                                                                                                                                                            |
| Reduced Chi-Sqr                                                                                                                                                                                                                                                                                                                                                                                                                                                                                                                                                                                                                                                                                                                                                                                                                                                                                                                                                                                                                                                                                                                                                                                                                                                                                                                                                                                                                                                                                                                                                                                                                                                                                                                                                                                                                                                                         | 3.03246E-10                                                                      |                   |                |  |          |                                                          |  |  |                 |             |  |  |         |  |  |  |               |         |       |                |     |             |            |            |     |              |         |         |       |              |            |            |          |                                  |         |         |                 |                   |  |  |          |                                                          |  |  |                 |             |       |                |         |             |            |            |               |             |         |                |                                                                                                                                                                                                                                                                                                                                                                                                                                                                                                                                                    |          |            |            |     |              |         |          |     |   |         |          |     |   |         |         |                                                                                                                                                                                                                                                                                                                                                                                                                                                                                                                                                                                                                                                                                                                                                                            |
| Chi-Sqr                                                                                                                                                                                                                                                                                                                                                                                                                                                                                                                                                                                                                                                                                                                                                                                                                                                                                                                                                                                                                                                                                                                                                                                                                                                                                                                                                                                                                                                                                                                                                                                                                                                                                                                                                                                                                                                                                 |                                                                                  |                   |                |  |          |                                                          |  |  |                 |             |  |  |         |  |  |  |               |         |       |                |     |             |            |            |     |              |         |         |       |              |            |            |          |                                  |         |         |                 |                   |  |  |          |                                                          |  |  |                 |             |       |                |         |             |            |            |               |             |         |                |                                                                                                                                                                                                                                                                                                                                                                                                                                                                                                                                                    |          |            |            |     |              |         |          |     |   |         |          |     |   |         |         |                                                                                                                                                                                                                                                                                                                                                                                                                                                                                                                                                                                                                                                                                                                                                                            |
| Adj. R-Square                                                                                                                                                                                                                                                                                                                                                                                                                                                                                                                                                                                                                                                                                                                                                                                                                                                                                                                                                                                                                                                                                                                                                                                                                                                                                                                                                                                                                                                                                                                                                                                                                                                                                                                                                                                                                                                                           | 0.97982                                                                          | Value             | Standard Error |  |          |                                                          |  |  |                 |             |  |  |         |  |  |  |               |         |       |                |     |             |            |            |     |              |         |         |       |              |            |            |          |                                  |         |         |                 |                   |  |  |          |                                                          |  |  |                 |             |       |                |         |             |            |            |               |             |         |                |                                                                                                                                                                                                                                                                                                                                                                                                                                                                                                                                                    |          |            |            |     |              |         |          |     |   |         |          |     |   |         |         |                                                                                                                                                                                                                                                                                                                                                                                                                                                                                                                                                                                                                                                                                                                                                                            |
| Tau                                                                                                                                                                                                                                                                                                                                                                                                                                                                                                                                                                                                                                                                                                                                                                                                                                                                                                                                                                                                                                                                                                                                                                                                                                                                                                                                                                                                                                                                                                                                                                                                                                                                                                                                                                                                                                                                                     | $C_{Raman}$                                                                      | 418.28194         | 44.91041       |  |          |                                                          |  |  |                 |             |  |  |         |  |  |  |               |         |       |                |     |             |            |            |     |              |         |         |       |              |            |            |          |                                  |         |         |                 |                   |  |  |          |                                                          |  |  |                 |             |       |                |         |             |            |            |               |             |         |                |                                                                                                                                                                                                                                                                                                                                                                                                                                                                                                                                                    |          |            |            |     |              |         |          |     |   |         |          |     |   |         |         |                                                                                                                                                                                                                                                                                                                                                                                                                                                                                                                                                                                                                                                                                                                                                                            |
| Tau                                                                                                                                                                                                                                                                                                                                                                                                                                                                                                                                                                                                                                                                                                                                                                                                                                                                                                                                                                                                                                                                                                                                                                                                                                                                                                                                                                                                                                                                                                                                                                                                                                                                                                                                                                                                                                                                                     | $n_{Raman}$                                                                      | 2.53386           | 0.12667        |  |          |                                                          |  |  |                 |             |  |  |         |  |  |  |               |         |       |                |     |             |            |            |     |              |         |         |       |              |            |            |          |                                  |         |         |                 |                   |  |  |          |                                                          |  |  |                 |             |       |                |         |             |            |            |               |             |         |                |                                                                                                                                                                                                                                                                                                                                                                                                                                                                                                                                                    |          |            |            |     |              |         |          |     |   |         |          |     |   |         |         |                                                                                                                                                                                                                                                                                                                                                                                                                                                                                                                                                                                                                                                                                                                                                                            |
| Model                                                                                                                                                                                                                                                                                                                                                                                                                                                                                                                                                                                                                                                                                                                                                                                                                                                                                                                                                                                                                                                                                                                                                                                                                                                                                                                                                                                                                                                                                                                                                                                                                                                                                                                                                                                                                                                                                   | Raman (User)                                                                     |                   |                |  |          |                                                          |  |  |                 |             |  |  |         |  |  |  |               |         |       |                |     |             |            |            |     |              |         |         |       |              |            |            |          |                                  |         |         |                 |                   |  |  |          |                                                          |  |  |                 |             |       |                |         |             |            |            |               |             |         |                |                                                                                                                                                                                                                                                                                                                                                                                                                                                                                                                                                    |          |            |            |     |              |         |          |     |   |         |          |     |   |         |         |                                                                                                                                                                                                                                                                                                                                                                                                                                                                                                                                                                                                                                                                                                                                                                            |
| Equation                                                                                                                                                                                                                                                                                                                                                                                                                                                                                                                                                                                                                                                                                                                                                                                                                                                                                                                                                                                                                                                                                                                                                                                                                                                                                                                                                                                                                                                                                                                                                                                                                                                                                                                                                                                                                                                                                | $\tau = C_{Raman} T^{n_{Raman}}$                                                 |                   |                |  |          |                                                          |  |  |                 |             |  |  |         |  |  |  |               |         |       |                |     |             |            |            |     |              |         |         |       |              |            |            |          |                                  |         |         |                 |                   |  |  |          |                                                          |  |  |                 |             |       |                |         |             |            |            |               |             |         |                |                                                                                                                                                                                                                                                                                                                                                                                                                                                                                                                                                    |          |            |            |     |              |         |          |     |   |         |          |     |   |         |         |                                                                                                                                                                                                                                                                                                                                                                                                                                                                                                                                                                                                                                                                                                                                                                            |
| Reduced Chi-Sqr                                                                                                                                                                                                                                                                                                                                                                                                                                                                                                                                                                                                                                                                                                                                                                                                                                                                                                                                                                                                                                                                                                                                                                                                                                                                                                                                                                                                                                                                                                                                                                                                                                                                                                                                                                                                                                                                         | 2.23403E-12                                                                      |                   |                |  |          |                                                          |  |  |                 |             |  |  |         |  |  |  |               |         |       |                |     |             |            |            |     |              |         |         |       |              |            |            |          |                                  |         |         |                 |                   |  |  |          |                                                          |  |  |                 |             |       |                |         |             |            |            |               |             |         |                |                                                                                                                                                                                                                                                                                                                                                                                                                                                                                                                                                    |          |            |            |     |              |         |          |     |   |         |          |     |   |         |         |                                                                                                                                                                                                                                                                                                                                                                                                                                                                                                                                                                                                                                                                                                                                                                            |
| Chi-Sqr                                                                                                                                                                                                                                                                                                                                                                                                                                                                                                                                                                                                                                                                                                                                                                                                                                                                                                                                                                                                                                                                                                                                                                                                                                                                                                                                                                                                                                                                                                                                                                                                                                                                                                                                                                                                                                                                                 |                                                                                  |                   |                |  |          |                                                          |  |  |                 |             |  |  |         |  |  |  |               |         |       |                |     |             |            |            |     |              |         |         |       |              |            |            |          |                                  |         |         |                 |                   |  |  |          |                                                          |  |  |                 |             |       |                |         |             |            |            |               |             |         |                |                                                                                                                                                                                                                                                                                                                                                                                                                                                                                                                                                    |          |            |            |     |              |         |          |     |   |         |          |     |   |         |         |                                                                                                                                                                                                                                                                                                                                                                                                                                                                                                                                                                                                                                                                                                                                                                            |
| Adj. R-Square                                                                                                                                                                                                                                                                                                                                                                                                                                                                                                                                                                                                                                                                                                                                                                                                                                                                                                                                                                                                                                                                                                                                                                                                                                                                                                                                                                                                                                                                                                                                                                                                                                                                                                                                                                                                                                                                           | 0.94304                                                                          | Value             | Standard Error |  |          |                                                          |  |  |                 |             |  |  |         |  |  |  |               |         |       |                |     |             |            |            |     |              |         |         |       |              |            |            |          |                                  |         |         |                 |                   |  |  |          |                                                          |  |  |                 |             |       |                |         |             |            |            |               |             |         |                |                                                                                                                                                                                                                                                                                                                                                                                                                                                                                                                                                    |          |            |            |     |              |         |          |     |   |         |          |     |   |         |         |                                                                                                                                                                                                                                                                                                                                                                                                                                                                                                                                                                                                                                                                                                                                                                            |
| Tau                                                                                                                                                                                                                                                                                                                                                                                                                                                                                                                                                                                                                                                                                                                                                                                                                                                                                                                                                                                                                                                                                                                                                                                                                                                                                                                                                                                                                                                                                                                                                                                                                                                                                                                                                                                                                                                                                     | $C_{Raman}$                                                                      | 12748             | 1066.76023     |  |          |                                                          |  |  |                 |             |  |  |         |  |  |  |               |         |       |                |     |             |            |            |     |              |         |         |       |              |            |            |          |                                  |         |         |                 |                   |  |  |          |                                                          |  |  |                 |             |       |                |         |             |            |            |               |             |         |                |                                                                                                                                                                                                                                                                                                                                                                                                                                                                                                                                                    |          |            |            |     |              |         |          |     |   |         |          |     |   |         |         |                                                                                                                                                                                                                                                                                                                                                                                                                                                                                                                                                                                                                                                                                                                                                                            |
| Tau                                                                                                                                                                                                                                                                                                                                                                                                                                                                                                                                                                                                                                                                                                                                                                                                                                                                                                                                                                                                                                                                                                                                                                                                                                                                                                                                                                                                                                                                                                                                                                                                                                                                                                                                                                                                                                                                                     | $n_{Raman}$                                                                      | 1.1031            | 0.09171        |  |          |                                                          |  |  |                 |             |  |  |         |  |  |  |               |         |       |                |     |             |            |            |     |              |         |         |       |              |            |            |          |                                  |         |         |                 |                   |  |  |          |                                                          |  |  |                 |             |       |                |         |             |            |            |               |             |         |                |                                                                                                                                                                                                                                                                                                                                                                                                                                                                                                                                                    |          |            |            |     |              |         |          |     |   |         |          |     |   |         |         |                                                                                                                                                                                                                                                                                                                                                                                                                                                                                                                                                                                                                                                                                                                                                                            |

**Fast relaxation process (black dots)**

**Raman**

$$\tau^{-1} = C_{\text{Raman}} T^{n_{\text{Raman}}}$$

$$T = 2-3.6 \text{ K}$$

$$C_{\text{Raman}} = 12748 \pm 1069 \text{ s}^{-1} \text{K}^{-n_{\text{Raman}}}$$

$$n_{\text{Raman}} = 1.10 \pm 0.09$$

$$R^2 = 0.94304$$

**Slow relaxation process (blue dots)**

**Raman+ QTM**

$$\tau^{-1} = C_{\text{Raman}} T^{n_{\text{Raman}}} + B$$

$$T = 2-4.2 \text{ K}$$

$$C_{\text{Raman}} = 33 \pm 4 \text{ s}^{-1} \text{K}^{-n_{\text{Raman}}}$$

$$n_{\text{Raman}} = 4.5 \pm 0.1$$

$$B = 1877 \pm 51 \text{ s}^{-1}$$

$$R^2 = 0.99946$$

**Fast relaxation process (black dots)**

**Raman+ QTM**

$$\tau^{-1} = C_{\text{Raman}} T^{n_{\text{Raman}}} + B$$

$$T = 2-3.6 \text{ K}$$

$$C_{\text{Raman}} = 124 \pm 56 \text{ s}^{-1} \text{K}^{-n_{\text{Raman}}}$$

$$n_{\text{Raman}} = 4.4 \pm 0.4$$

$$B = 26409 \pm 728 \text{ s}^{-1}$$

$$R^2 = 0.99486$$

**Slow relaxation process (blue dots)**

**Raman+Direct**

$$\tau^{-1} = C_{\text{Raman}} T^{n_{\text{Raman}}} + A_{\text{direct}} T H^4$$

$$T = 2-4.2 \text{ K}$$

$$C_{\text{Raman}} = 5.8 \pm 0.6 \text{ s}^{-1} \text{K}^{-n_{\text{Raman}}}$$

$$n_{\text{Raman}} = 5.64 \pm 0.08$$

$$A_{\text{direct}} = 2.27 \cdot 10^{-10} \pm 2 \cdot 10^{-12} \text{ K}^{-1} \text{Oe}^{-4} \text{s}^{-1}$$

$$R^2 = 0.99986$$

**Fast relaxation process (black dots)**

**Raman+Direct**

$$\tau^{-1} = C_{\text{Raman}} T^{n_{\text{Raman}}} + A_{\text{direct}} T H^4$$

$$T = 2-3.6 \text{ K}$$

$$C_{\text{Raman}} = 0.002 \pm 0.018 \text{ s}^{-1} \text{K}^{-n_{\text{Raman}}}$$

$$n_{\text{Raman}} = 12 \pm 6$$

$$A_{\text{direct}} = 2.71 \cdot 10^{-9} \pm 4 \cdot 10^{-11} \text{ K}^{-1} \text{Oe}^{-4} \text{s}^{-1}$$

$$R^2 = 0.97367$$

*Over-parametrization*

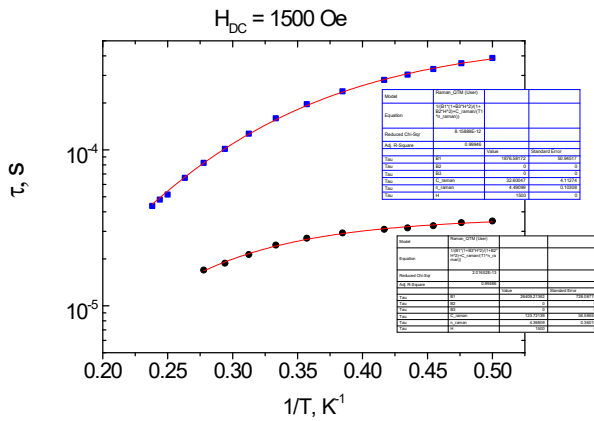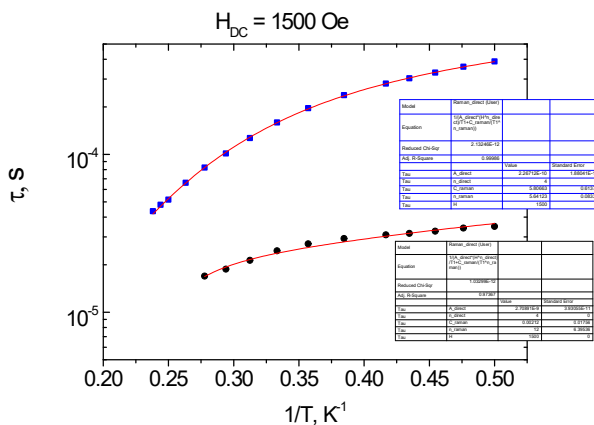

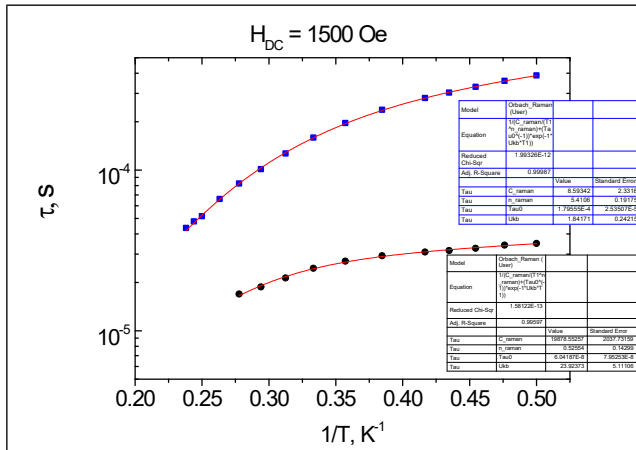

**Slow relaxation process (blue dots)**

**Orbach+Raman**

$$\tau^{-1} = \tau_0^{-1} \cdot \exp\{-\Delta E/kT\} + C_{\text{Raman}} T^{n_{\text{Raman}}}$$

$$T = 2-4.2 \text{ K}$$

$$\Delta E/k = 1.8 \pm 0.2 \text{ K}$$

$$\tau_0 = 1.8 \cdot 10^{-4} \pm 3 \cdot 10^{-5} \text{ s}$$

$$C_{\text{Raman}} = 9 \pm 2 \text{ s}^{-1} \text{K}^{-n_{\text{Raman}}}$$

$$n_{\text{Raman}} = 5.4 \pm 0.2$$

$$R^2 = 0.99987$$

**Fast relaxation process (black dots)**

**Orbach+Raman**

$$\tau^{-1} = \tau_0^{-1} \cdot \exp\{-\Delta E/kT\} + C_{\text{Raman}} T^{n_{\text{Raman}}}$$

$$T = 2-3.6 \text{ K}$$

$$\Delta E/k = 24 \pm 5 \text{ K}$$

$$\tau_0 = 6 \cdot 10^{-8} \pm 8 \cdot 10^{-8} \text{ s}$$

$$C_{\text{Raman}} = 19879 \pm 2038 \text{ s}^{-1} \text{K}^{-n_{\text{Raman}}}$$

$$n_{\text{Raman}} = 0.5 \pm 0.1$$

$$R^2 = 0.99597$$

**Over-parametrization**

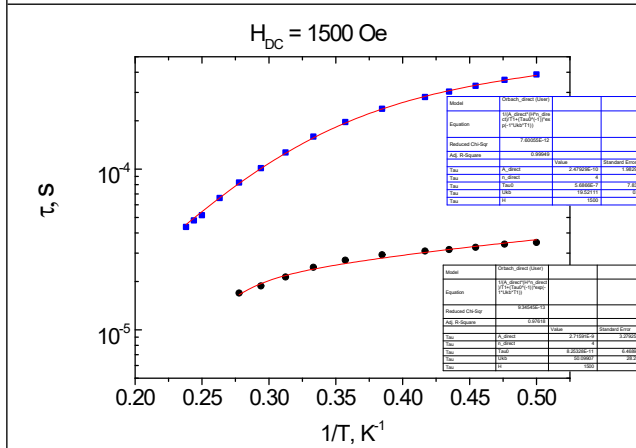

**Slow relaxation process (blue dots)**

**Orbach+Direct**

$$\tau^{-1} = \tau_0^{-1} \cdot \exp\{-\Delta E/kT\} + A_{\text{direct}} T^4$$

$$T = 2-4.2 \text{ K}$$

$$\Delta E/k = 19.5 \pm 0.5 \text{ K}$$

$$\tau_0 = 5.7 \cdot 10^{-7} \pm 8 \cdot 10^{-8} \text{ s}$$

$$A_{\text{direct}} = 2.48 \cdot 10^{10} \pm 2 \cdot 10^{12} \text{ K}^{-1} \text{Oe}^{-4} \text{s}^{-1}$$

$$R^2 = 0.99949$$

**Fast relaxation process (black dots)**

**Orbach+Direct**

$$\tau^{-1} = \tau_0^{-1} \cdot \exp\{-\Delta E/kT\} + A_{\text{direct}} T^4$$

$$T = 2-3.6 \text{ K}$$

$$\Delta E/k = 50 \pm 28 \text{ K}$$

$$\tau_0 = 8 \cdot 10^{-11} \pm 6 \cdot 10^{-10} \text{ s}$$

$$A_{\text{direct}} = 2.72 \cdot 10^9 \pm 3 \cdot 10^{11} \text{ K}^{-1} \text{Oe}^{-4} \text{s}^{-1}$$

$$R^2 = 0.97618$$

**Over-parametrization**

**Table S10.** Fitting of the  $\tau$  vs.  $T$  dependences for  $2Dy$ .

| Dependence of the relaxation time $\tau$ on the reciprocal temperature for $2Dy$ ( $H = 500$ Oe, $T = 2-3.5$ K).                                                                                                                                                                                                                                                                                                                                                                                                                                                                                                                                                                                                                                                                                                                                                                                                                                                                                                                                                                                                                                                                                                                                                                                                                                                                                                                     | Fit function, temperature range, and the best-fit parameters with uncertainties. |                |            |                                                          |                 |             |               |         |           |       |                |     |         |            |            |     |         |          |         |                                                                                                                                                                                                                                                                |           |          |                                     |                 |            |               |            |           |         |                |         |     |            |            |     |                                                                                                                                                                                                                                                                                                                            |          |         |                                                                                                                                                                                                                                                                                                                                                                                                                                                     |
|--------------------------------------------------------------------------------------------------------------------------------------------------------------------------------------------------------------------------------------------------------------------------------------------------------------------------------------------------------------------------------------------------------------------------------------------------------------------------------------------------------------------------------------------------------------------------------------------------------------------------------------------------------------------------------------------------------------------------------------------------------------------------------------------------------------------------------------------------------------------------------------------------------------------------------------------------------------------------------------------------------------------------------------------------------------------------------------------------------------------------------------------------------------------------------------------------------------------------------------------------------------------------------------------------------------------------------------------------------------------------------------------------------------------------------------|----------------------------------------------------------------------------------|----------------|------------|----------------------------------------------------------|-----------------|-------------|---------------|---------|-----------|-------|----------------|-----|---------|------------|------------|-----|---------|----------|---------|----------------------------------------------------------------------------------------------------------------------------------------------------------------------------------------------------------------------------------------------------------------|-----------|----------|-------------------------------------|-----------------|------------|---------------|------------|-----------|---------|----------------|---------|-----|------------|------------|-----|----------------------------------------------------------------------------------------------------------------------------------------------------------------------------------------------------------------------------------------------------------------------------------------------------------------------------|----------|---------|-----------------------------------------------------------------------------------------------------------------------------------------------------------------------------------------------------------------------------------------------------------------------------------------------------------------------------------------------------------------------------------------------------------------------------------------------------|
| 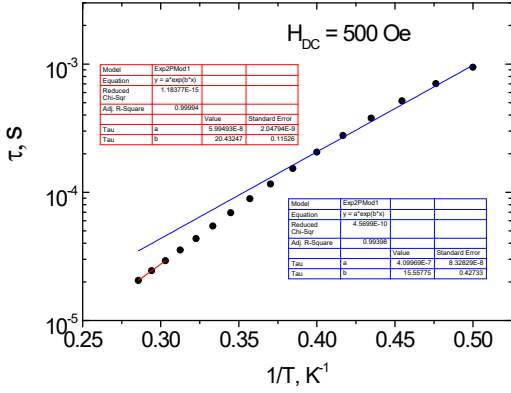 <p><math>H_{DC} = 500</math> Oe</p> <table border="1" data-bbox="316 412 507 495"> <thead> <tr> <th>Model</th> <th>ExpOrbAd1</th> </tr> </thead> <tbody> <tr> <td>Equation</td> <td><math>\tau = \tau_0 \exp\{\Delta E/kT\}</math></td> </tr> <tr> <td>Reduced Chi-Sqr</td> <td>1.18377E-10</td> </tr> <tr> <td>Adj. R-Square</td> <td>0.99994</td> </tr> </tbody> </table> <table border="1" data-bbox="316 456 507 495"> <thead> <tr> <th>Parameter</th> <th>Value</th> <th>Standard Error</th> </tr> </thead> <tbody> <tr> <td>Tau</td> <td>a</td> <td>5.99493E-8</td> <td>2.04794E-9</td> </tr> <tr> <td>Tau</td> <td>b</td> <td>20.43247</td> <td>0.11526</td> </tr> </tbody> </table> <table border="1" data-bbox="507 546 703 629"> <thead> <tr> <th>Model</th> <th>ExpOrbAd1</th> </tr> </thead> <tbody> <tr> <td>Equation</td> <td><math>\tau = \tau_0 \exp\{\Delta E/kT\}</math></td> </tr> <tr> <td>Reduced Chi-Sqr</td> <td>4.5699E-10</td> </tr> <tr> <td>Adj. R-Square</td> <td>0.99308</td> </tr> </tbody> </table> <table border="1" data-bbox="507 591 703 629"> <thead> <tr> <th>Parameter</th> <th>Value</th> <th>Standard Error</th> </tr> </thead> <tbody> <tr> <td>Tau</td> <td>a</td> <td>4.20996E-7</td> <td>8.32056E-8</td> </tr> <tr> <td>Tau</td> <td>b</td> <td>15.53775</td> <td>0.42793</td> </tr> </tbody> </table> | Model                                                                            | ExpOrbAd1      | Equation   | $\tau = \tau_0 \exp\{\Delta E/kT\}$                      | Reduced Chi-Sqr | 1.18377E-10 | Adj. R-Square | 0.99994 | Parameter | Value | Standard Error | Tau | a       | 5.99493E-8 | 2.04794E-9 | Tau | b       | 20.43247 | 0.11526 | Model                                                                                                                                                                                                                                                          | ExpOrbAd1 | Equation | $\tau = \tau_0 \exp\{\Delta E/kT\}$ | Reduced Chi-Sqr | 4.5699E-10 | Adj. R-Square | 0.99308    | Parameter | Value   | Standard Error | Tau     | a   | 4.20996E-7 | 8.32056E-8 | Tau | b                                                                                                                                                                                                                                                                                                                          | 15.53775 | 0.42793 | <p><b>Orbach</b></p> $\tau = \tau_0 \exp\{\Delta E/kT\}$ <p><math>T = 3.3-3.5</math> K<br/> <math>\Delta E/k = 20.4 \pm 0.1</math> K<br/> <math>\tau_0 = 6.0 \cdot 10^{-8} \pm 2 \cdot 10^{-9}</math> s<br/> <math>R^2 = 0.99994</math> (red line)</p> <p><math>T = 2-3.5</math> K<br/> <math>\Delta E/k = 15.6 \pm 0.4</math> K<br/> <math>\tau_0 = 4.1 \cdot 10^{-7} \pm 8 \cdot 10^{-8}</math> s<br/> <math>R^2 = 0.99398</math> (blue line)</p> |
| Model                                                                                                                                                                                                                                                                                                                                                                                                                                                                                                                                                                                                                                                                                                                                                                                                                                                                                                                                                                                                                                                                                                                                                                                                                                                                                                                                                                                                                                | ExpOrbAd1                                                                        |                |            |                                                          |                 |             |               |         |           |       |                |     |         |            |            |     |         |          |         |                                                                                                                                                                                                                                                                |           |          |                                     |                 |            |               |            |           |         |                |         |     |            |            |     |                                                                                                                                                                                                                                                                                                                            |          |         |                                                                                                                                                                                                                                                                                                                                                                                                                                                     |
| Equation                                                                                                                                                                                                                                                                                                                                                                                                                                                                                                                                                                                                                                                                                                                                                                                                                                                                                                                                                                                                                                                                                                                                                                                                                                                                                                                                                                                                                             | $\tau = \tau_0 \exp\{\Delta E/kT\}$                                              |                |            |                                                          |                 |             |               |         |           |       |                |     |         |            |            |     |         |          |         |                                                                                                                                                                                                                                                                |           |          |                                     |                 |            |               |            |           |         |                |         |     |            |            |     |                                                                                                                                                                                                                                                                                                                            |          |         |                                                                                                                                                                                                                                                                                                                                                                                                                                                     |
| Reduced Chi-Sqr                                                                                                                                                                                                                                                                                                                                                                                                                                                                                                                                                                                                                                                                                                                                                                                                                                                                                                                                                                                                                                                                                                                                                                                                                                                                                                                                                                                                                      | 1.18377E-10                                                                      |                |            |                                                          |                 |             |               |         |           |       |                |     |         |            |            |     |         |          |         |                                                                                                                                                                                                                                                                |           |          |                                     |                 |            |               |            |           |         |                |         |     |            |            |     |                                                                                                                                                                                                                                                                                                                            |          |         |                                                                                                                                                                                                                                                                                                                                                                                                                                                     |
| Adj. R-Square                                                                                                                                                                                                                                                                                                                                                                                                                                                                                                                                                                                                                                                                                                                                                                                                                                                                                                                                                                                                                                                                                                                                                                                                                                                                                                                                                                                                                        | 0.99994                                                                          |                |            |                                                          |                 |             |               |         |           |       |                |     |         |            |            |     |         |          |         |                                                                                                                                                                                                                                                                |           |          |                                     |                 |            |               |            |           |         |                |         |     |            |            |     |                                                                                                                                                                                                                                                                                                                            |          |         |                                                                                                                                                                                                                                                                                                                                                                                                                                                     |
| Parameter                                                                                                                                                                                                                                                                                                                                                                                                                                                                                                                                                                                                                                                                                                                                                                                                                                                                                                                                                                                                                                                                                                                                                                                                                                                                                                                                                                                                                            | Value                                                                            | Standard Error |            |                                                          |                 |             |               |         |           |       |                |     |         |            |            |     |         |          |         |                                                                                                                                                                                                                                                                |           |          |                                     |                 |            |               |            |           |         |                |         |     |            |            |     |                                                                                                                                                                                                                                                                                                                            |          |         |                                                                                                                                                                                                                                                                                                                                                                                                                                                     |
| Tau                                                                                                                                                                                                                                                                                                                                                                                                                                                                                                                                                                                                                                                                                                                                                                                                                                                                                                                                                                                                                                                                                                                                                                                                                                                                                                                                                                                                                                  | a                                                                                | 5.99493E-8     | 2.04794E-9 |                                                          |                 |             |               |         |           |       |                |     |         |            |            |     |         |          |         |                                                                                                                                                                                                                                                                |           |          |                                     |                 |            |               |            |           |         |                |         |     |            |            |     |                                                                                                                                                                                                                                                                                                                            |          |         |                                                                                                                                                                                                                                                                                                                                                                                                                                                     |
| Tau                                                                                                                                                                                                                                                                                                                                                                                                                                                                                                                                                                                                                                                                                                                                                                                                                                                                                                                                                                                                                                                                                                                                                                                                                                                                                                                                                                                                                                  | b                                                                                | 20.43247       | 0.11526    |                                                          |                 |             |               |         |           |       |                |     |         |            |            |     |         |          |         |                                                                                                                                                                                                                                                                |           |          |                                     |                 |            |               |            |           |         |                |         |     |            |            |     |                                                                                                                                                                                                                                                                                                                            |          |         |                                                                                                                                                                                                                                                                                                                                                                                                                                                     |
| Model                                                                                                                                                                                                                                                                                                                                                                                                                                                                                                                                                                                                                                                                                                                                                                                                                                                                                                                                                                                                                                                                                                                                                                                                                                                                                                                                                                                                                                | ExpOrbAd1                                                                        |                |            |                                                          |                 |             |               |         |           |       |                |     |         |            |            |     |         |          |         |                                                                                                                                                                                                                                                                |           |          |                                     |                 |            |               |            |           |         |                |         |     |            |            |     |                                                                                                                                                                                                                                                                                                                            |          |         |                                                                                                                                                                                                                                                                                                                                                                                                                                                     |
| Equation                                                                                                                                                                                                                                                                                                                                                                                                                                                                                                                                                                                                                                                                                                                                                                                                                                                                                                                                                                                                                                                                                                                                                                                                                                                                                                                                                                                                                             | $\tau = \tau_0 \exp\{\Delta E/kT\}$                                              |                |            |                                                          |                 |             |               |         |           |       |                |     |         |            |            |     |         |          |         |                                                                                                                                                                                                                                                                |           |          |                                     |                 |            |               |            |           |         |                |         |     |            |            |     |                                                                                                                                                                                                                                                                                                                            |          |         |                                                                                                                                                                                                                                                                                                                                                                                                                                                     |
| Reduced Chi-Sqr                                                                                                                                                                                                                                                                                                                                                                                                                                                                                                                                                                                                                                                                                                                                                                                                                                                                                                                                                                                                                                                                                                                                                                                                                                                                                                                                                                                                                      | 4.5699E-10                                                                       |                |            |                                                          |                 |             |               |         |           |       |                |     |         |            |            |     |         |          |         |                                                                                                                                                                                                                                                                |           |          |                                     |                 |            |               |            |           |         |                |         |     |            |            |     |                                                                                                                                                                                                                                                                                                                            |          |         |                                                                                                                                                                                                                                                                                                                                                                                                                                                     |
| Adj. R-Square                                                                                                                                                                                                                                                                                                                                                                                                                                                                                                                                                                                                                                                                                                                                                                                                                                                                                                                                                                                                                                                                                                                                                                                                                                                                                                                                                                                                                        | 0.99308                                                                          |                |            |                                                          |                 |             |               |         |           |       |                |     |         |            |            |     |         |          |         |                                                                                                                                                                                                                                                                |           |          |                                     |                 |            |               |            |           |         |                |         |     |            |            |     |                                                                                                                                                                                                                                                                                                                            |          |         |                                                                                                                                                                                                                                                                                                                                                                                                                                                     |
| Parameter                                                                                                                                                                                                                                                                                                                                                                                                                                                                                                                                                                                                                                                                                                                                                                                                                                                                                                                                                                                                                                                                                                                                                                                                                                                                                                                                                                                                                            | Value                                                                            | Standard Error |            |                                                          |                 |             |               |         |           |       |                |     |         |            |            |     |         |          |         |                                                                                                                                                                                                                                                                |           |          |                                     |                 |            |               |            |           |         |                |         |     |            |            |     |                                                                                                                                                                                                                                                                                                                            |          |         |                                                                                                                                                                                                                                                                                                                                                                                                                                                     |
| Tau                                                                                                                                                                                                                                                                                                                                                                                                                                                                                                                                                                                                                                                                                                                                                                                                                                                                                                                                                                                                                                                                                                                                                                                                                                                                                                                                                                                                                                  | a                                                                                | 4.20996E-7     | 8.32056E-8 |                                                          |                 |             |               |         |           |       |                |     |         |            |            |     |         |          |         |                                                                                                                                                                                                                                                                |           |          |                                     |                 |            |               |            |           |         |                |         |     |            |            |     |                                                                                                                                                                                                                                                                                                                            |          |         |                                                                                                                                                                                                                                                                                                                                                                                                                                                     |
| Tau                                                                                                                                                                                                                                                                                                                                                                                                                                                                                                                                                                                                                                                                                                                                                                                                                                                                                                                                                                                                                                                                                                                                                                                                                                                                                                                                                                                                                                  | b                                                                                | 15.53775       | 0.42793    |                                                          |                 |             |               |         |           |       |                |     |         |            |            |     |         |          |         |                                                                                                                                                                                                                                                                |           |          |                                     |                 |            |               |            |           |         |                |         |     |            |            |     |                                                                                                                                                                                                                                                                                                                            |          |         |                                                                                                                                                                                                                                                                                                                                                                                                                                                     |
|  <p><math>H_{DC} = 500</math> Oe</p> <table border="1" data-bbox="284 826 480 954"> <thead> <tr> <th>Model</th> <th>Orbach_QTM1</th> </tr> </thead> <tbody> <tr> <td>Equation</td> <td><math>\tau^{-1} = \tau_0^{-1} \cdot \exp\{-\Delta E/kT\} + B</math></td> </tr> <tr> <td>Reduced Chi-Sqr</td> <td>2.23386E-12</td> </tr> <tr> <td>Adj. R-Square</td> <td>0.99997</td> </tr> </tbody> </table> <table border="1" data-bbox="284 909 480 954"> <thead> <tr> <th>Parameter</th> <th>Value</th> <th>Standard Error</th> </tr> </thead> <tbody> <tr> <td>Tau</td> <td>B1</td> <td>498.38053</td> <td>6.48976</td> </tr> <tr> <td>Tau</td> <td>B2</td> <td>0</td> <td>0</td> </tr> <tr> <td>Tau</td> <td>B3</td> <td>0</td> <td>0</td> </tr> <tr> <td>Tau</td> <td>tau0</td> <td>5.93888E-8</td> <td>2.47028E-8</td> </tr> <tr> <td>Tau</td> <td>Delta</td> <td>20.62278</td> <td>0.10885</td> </tr> <tr> <td>Tau</td> <td>H</td> <td>500</td> <td>0</td> </tr> </tbody> </table>                                                                                                                                                                                                                                                                                                                                                                  | Model                                                                            | Orbach_QTM1    | Equation   | $\tau^{-1} = \tau_0^{-1} \cdot \exp\{-\Delta E/kT\} + B$ | Reduced Chi-Sqr | 2.23386E-12 | Adj. R-Square | 0.99997 | Parameter | Value | Standard Error | Tau | B1      | 498.38053  | 6.48976    | Tau | B2      | 0        | 0       | Tau                                                                                                                                                                                                                                                            | B3        | 0        | 0                                   | Tau             | tau0       | 5.93888E-8    | 2.47028E-8 | Tau       | Delta   | 20.62278       | 0.10885 | Tau | H          | 500        | 0   | <p><b>Orbach+ QTM</b></p> $\tau^{-1} = \tau_0^{-1} \cdot \exp\{-\Delta E/kT\} + B$ <p><math>T = 2-3.5</math> K<br/> <math>\Delta E/k = 20.6 \pm 0.1</math> K<br/> <math>\tau_0 = 5.9 \cdot 10^{-8} \pm 2 \cdot 10^{-9}</math> s<br/> <math>B = 498 \pm 6</math> s<math>^{-1}</math><br/> <math>R^2 = 0.99997</math></p>    |          |         |                                                                                                                                                                                                                                                                                                                                                                                                                                                     |
| Model                                                                                                                                                                                                                                                                                                                                                                                                                                                                                                                                                                                                                                                                                                                                                                                                                                                                                                                                                                                                                                                                                                                                                                                                                                                                                                                                                                                                                                | Orbach_QTM1                                                                      |                |            |                                                          |                 |             |               |         |           |       |                |     |         |            |            |     |         |          |         |                                                                                                                                                                                                                                                                |           |          |                                     |                 |            |               |            |           |         |                |         |     |            |            |     |                                                                                                                                                                                                                                                                                                                            |          |         |                                                                                                                                                                                                                                                                                                                                                                                                                                                     |
| Equation                                                                                                                                                                                                                                                                                                                                                                                                                                                                                                                                                                                                                                                                                                                                                                                                                                                                                                                                                                                                                                                                                                                                                                                                                                                                                                                                                                                                                             | $\tau^{-1} = \tau_0^{-1} \cdot \exp\{-\Delta E/kT\} + B$                         |                |            |                                                          |                 |             |               |         |           |       |                |     |         |            |            |     |         |          |         |                                                                                                                                                                                                                                                                |           |          |                                     |                 |            |               |            |           |         |                |         |     |            |            |     |                                                                                                                                                                                                                                                                                                                            |          |         |                                                                                                                                                                                                                                                                                                                                                                                                                                                     |
| Reduced Chi-Sqr                                                                                                                                                                                                                                                                                                                                                                                                                                                                                                                                                                                                                                                                                                                                                                                                                                                                                                                                                                                                                                                                                                                                                                                                                                                                                                                                                                                                                      | 2.23386E-12                                                                      |                |            |                                                          |                 |             |               |         |           |       |                |     |         |            |            |     |         |          |         |                                                                                                                                                                                                                                                                |           |          |                                     |                 |            |               |            |           |         |                |         |     |            |            |     |                                                                                                                                                                                                                                                                                                                            |          |         |                                                                                                                                                                                                                                                                                                                                                                                                                                                     |
| Adj. R-Square                                                                                                                                                                                                                                                                                                                                                                                                                                                                                                                                                                                                                                                                                                                                                                                                                                                                                                                                                                                                                                                                                                                                                                                                                                                                                                                                                                                                                        | 0.99997                                                                          |                |            |                                                          |                 |             |               |         |           |       |                |     |         |            |            |     |         |          |         |                                                                                                                                                                                                                                                                |           |          |                                     |                 |            |               |            |           |         |                |         |     |            |            |     |                                                                                                                                                                                                                                                                                                                            |          |         |                                                                                                                                                                                                                                                                                                                                                                                                                                                     |
| Parameter                                                                                                                                                                                                                                                                                                                                                                                                                                                                                                                                                                                                                                                                                                                                                                                                                                                                                                                                                                                                                                                                                                                                                                                                                                                                                                                                                                                                                            | Value                                                                            | Standard Error |            |                                                          |                 |             |               |         |           |       |                |     |         |            |            |     |         |          |         |                                                                                                                                                                                                                                                                |           |          |                                     |                 |            |               |            |           |         |                |         |     |            |            |     |                                                                                                                                                                                                                                                                                                                            |          |         |                                                                                                                                                                                                                                                                                                                                                                                                                                                     |
| Tau                                                                                                                                                                                                                                                                                                                                                                                                                                                                                                                                                                                                                                                                                                                                                                                                                                                                                                                                                                                                                                                                                                                                                                                                                                                                                                                                                                                                                                  | B1                                                                               | 498.38053      | 6.48976    |                                                          |                 |             |               |         |           |       |                |     |         |            |            |     |         |          |         |                                                                                                                                                                                                                                                                |           |          |                                     |                 |            |               |            |           |         |                |         |     |            |            |     |                                                                                                                                                                                                                                                                                                                            |          |         |                                                                                                                                                                                                                                                                                                                                                                                                                                                     |
| Tau                                                                                                                                                                                                                                                                                                                                                                                                                                                                                                                                                                                                                                                                                                                                                                                                                                                                                                                                                                                                                                                                                                                                                                                                                                                                                                                                                                                                                                  | B2                                                                               | 0              | 0          |                                                          |                 |             |               |         |           |       |                |     |         |            |            |     |         |          |         |                                                                                                                                                                                                                                                                |           |          |                                     |                 |            |               |            |           |         |                |         |     |            |            |     |                                                                                                                                                                                                                                                                                                                            |          |         |                                                                                                                                                                                                                                                                                                                                                                                                                                                     |
| Tau                                                                                                                                                                                                                                                                                                                                                                                                                                                                                                                                                                                                                                                                                                                                                                                                                                                                                                                                                                                                                                                                                                                                                                                                                                                                                                                                                                                                                                  | B3                                                                               | 0              | 0          |                                                          |                 |             |               |         |           |       |                |     |         |            |            |     |         |          |         |                                                                                                                                                                                                                                                                |           |          |                                     |                 |            |               |            |           |         |                |         |     |            |            |     |                                                                                                                                                                                                                                                                                                                            |          |         |                                                                                                                                                                                                                                                                                                                                                                                                                                                     |
| Tau                                                                                                                                                                                                                                                                                                                                                                                                                                                                                                                                                                                                                                                                                                                                                                                                                                                                                                                                                                                                                                                                                                                                                                                                                                                                                                                                                                                                                                  | tau0                                                                             | 5.93888E-8     | 2.47028E-8 |                                                          |                 |             |               |         |           |       |                |     |         |            |            |     |         |          |         |                                                                                                                                                                                                                                                                |           |          |                                     |                 |            |               |            |           |         |                |         |     |            |            |     |                                                                                                                                                                                                                                                                                                                            |          |         |                                                                                                                                                                                                                                                                                                                                                                                                                                                     |
| Tau                                                                                                                                                                                                                                                                                                                                                                                                                                                                                                                                                                                                                                                                                                                                                                                                                                                                                                                                                                                                                                                                                                                                                                                                                                                                                                                                                                                                                                  | Delta                                                                            | 20.62278       | 0.10885    |                                                          |                 |             |               |         |           |       |                |     |         |            |            |     |         |          |         |                                                                                                                                                                                                                                                                |           |          |                                     |                 |            |               |            |           |         |                |         |     |            |            |     |                                                                                                                                                                                                                                                                                                                            |          |         |                                                                                                                                                                                                                                                                                                                                                                                                                                                     |
| Tau                                                                                                                                                                                                                                                                                                                                                                                                                                                                                                                                                                                                                                                                                                                                                                                                                                                                                                                                                                                                                                                                                                                                                                                                                                                                                                                                                                                                                                  | H                                                                                | 500            | 0          |                                                          |                 |             |               |         |           |       |                |     |         |            |            |     |         |          |         |                                                                                                                                                                                                                                                                |           |          |                                     |                 |            |               |            |           |         |                |         |     |            |            |     |                                                                                                                                                                                                                                                                                                                            |          |         |                                                                                                                                                                                                                                                                                                                                                                                                                                                     |
|  <p><math>H_{DC} = 500</math> Oe</p> <table border="1" data-bbox="300 1245 464 1328"> <thead> <tr> <th>Model</th> <th>Raman_Ubarr</th> </tr> </thead> <tbody> <tr> <td>Equation</td> <td><math>\tau^{-1} = C_{Raman} T^{n_{Raman}}</math></td> </tr> <tr> <td>Reduced Chi-Sqr</td> <td>7.91688E-11</td> </tr> <tr> <td>Adj. R-Square</td> <td>0.99898</td> </tr> </tbody> </table> <table border="1" data-bbox="300 1283 464 1328"> <thead> <tr> <th>Parameter</th> <th>Value</th> <th>Standard Error</th> </tr> </thead> <tbody> <tr> <td>Tau</td> <td>C_Raman</td> <td>9.19239</td> <td>0.58457</td> </tr> <tr> <td>Tau</td> <td>n_Raman</td> <td>6.82146</td> <td>0.08502</td> </tr> </tbody> </table>                                                                                                                                                                                                                                                                                                                                                                                                                                                                                                                                                                                                                                         | Model                                                                            | Raman_Ubarr    | Equation   | $\tau^{-1} = C_{Raman} T^{n_{Raman}}$                    | Reduced Chi-Sqr | 7.91688E-11 | Adj. R-Square | 0.99898 | Parameter | Value | Standard Error | Tau | C_Raman | 9.19239    | 0.58457    | Tau | n_Raman | 6.82146  | 0.08502 | <p><b>Raman</b></p> $\tau^{-1} = C_{Raman} T^{n_{Raman}}$ <p><math>T = 2-3.5</math> K<br/> <math>C_{Raman} = 9.2 \pm 0.6</math> s<math>^{-1}</math>K<math>^{-n_{Raman}}</math><br/> <math>n_{Raman} = 6.82 \pm 0.09</math><br/> <math>R^2 = 0.99896</math></p> |           |          |                                     |                 |            |               |            |           |         |                |         |     |            |            |     |                                                                                                                                                                                                                                                                                                                            |          |         |                                                                                                                                                                                                                                                                                                                                                                                                                                                     |
| Model                                                                                                                                                                                                                                                                                                                                                                                                                                                                                                                                                                                                                                                                                                                                                                                                                                                                                                                                                                                                                                                                                                                                                                                                                                                                                                                                                                                                                                | Raman_Ubarr                                                                      |                |            |                                                          |                 |             |               |         |           |       |                |     |         |            |            |     |         |          |         |                                                                                                                                                                                                                                                                |           |          |                                     |                 |            |               |            |           |         |                |         |     |            |            |     |                                                                                                                                                                                                                                                                                                                            |          |         |                                                                                                                                                                                                                                                                                                                                                                                                                                                     |
| Equation                                                                                                                                                                                                                                                                                                                                                                                                                                                                                                                                                                                                                                                                                                                                                                                                                                                                                                                                                                                                                                                                                                                                                                                                                                                                                                                                                                                                                             | $\tau^{-1} = C_{Raman} T^{n_{Raman}}$                                            |                |            |                                                          |                 |             |               |         |           |       |                |     |         |            |            |     |         |          |         |                                                                                                                                                                                                                                                                |           |          |                                     |                 |            |               |            |           |         |                |         |     |            |            |     |                                                                                                                                                                                                                                                                                                                            |          |         |                                                                                                                                                                                                                                                                                                                                                                                                                                                     |
| Reduced Chi-Sqr                                                                                                                                                                                                                                                                                                                                                                                                                                                                                                                                                                                                                                                                                                                                                                                                                                                                                                                                                                                                                                                                                                                                                                                                                                                                                                                                                                                                                      | 7.91688E-11                                                                      |                |            |                                                          |                 |             |               |         |           |       |                |     |         |            |            |     |         |          |         |                                                                                                                                                                                                                                                                |           |          |                                     |                 |            |               |            |           |         |                |         |     |            |            |     |                                                                                                                                                                                                                                                                                                                            |          |         |                                                                                                                                                                                                                                                                                                                                                                                                                                                     |
| Adj. R-Square                                                                                                                                                                                                                                                                                                                                                                                                                                                                                                                                                                                                                                                                                                                                                                                                                                                                                                                                                                                                                                                                                                                                                                                                                                                                                                                                                                                                                        | 0.99898                                                                          |                |            |                                                          |                 |             |               |         |           |       |                |     |         |            |            |     |         |          |         |                                                                                                                                                                                                                                                                |           |          |                                     |                 |            |               |            |           |         |                |         |     |            |            |     |                                                                                                                                                                                                                                                                                                                            |          |         |                                                                                                                                                                                                                                                                                                                                                                                                                                                     |
| Parameter                                                                                                                                                                                                                                                                                                                                                                                                                                                                                                                                                                                                                                                                                                                                                                                                                                                                                                                                                                                                                                                                                                                                                                                                                                                                                                                                                                                                                            | Value                                                                            | Standard Error |            |                                                          |                 |             |               |         |           |       |                |     |         |            |            |     |         |          |         |                                                                                                                                                                                                                                                                |           |          |                                     |                 |            |               |            |           |         |                |         |     |            |            |     |                                                                                                                                                                                                                                                                                                                            |          |         |                                                                                                                                                                                                                                                                                                                                                                                                                                                     |
| Tau                                                                                                                                                                                                                                                                                                                                                                                                                                                                                                                                                                                                                                                                                                                                                                                                                                                                                                                                                                                                                                                                                                                                                                                                                                                                                                                                                                                                                                  | C_Raman                                                                          | 9.19239        | 0.58457    |                                                          |                 |             |               |         |           |       |                |     |         |            |            |     |         |          |         |                                                                                                                                                                                                                                                                |           |          |                                     |                 |            |               |            |           |         |                |         |     |            |            |     |                                                                                                                                                                                                                                                                                                                            |          |         |                                                                                                                                                                                                                                                                                                                                                                                                                                                     |
| Tau                                                                                                                                                                                                                                                                                                                                                                                                                                                                                                                                                                                                                                                                                                                                                                                                                                                                                                                                                                                                                                                                                                                                                                                                                                                                                                                                                                                                                                  | n_Raman                                                                          | 6.82146        | 0.08502    |                                                          |                 |             |               |         |           |       |                |     |         |            |            |     |         |          |         |                                                                                                                                                                                                                                                                |           |          |                                     |                 |            |               |            |           |         |                |         |     |            |            |     |                                                                                                                                                                                                                                                                                                                            |          |         |                                                                                                                                                                                                                                                                                                                                                                                                                                                     |
|  <p><math>H_{DC} = 500</math> Oe</p> <table border="1" data-bbox="284 1574 480 1702"> <thead> <tr> <th>Model</th> <th>Raman_QTM1</th> </tr> </thead> <tbody> <tr> <td>Equation</td> <td><math>\tau^{-1} = C_{Raman} T^{n_{Raman}} + B</math></td> </tr> <tr> <td>Reduced Chi-Sqr</td> <td>8.91386E-12</td> </tr> <tr> <td>Adj. R-Square</td> <td>0.99988</td> </tr> </tbody> </table> <table border="1" data-bbox="284 1657 480 1702"> <thead> <tr> <th>Parameter</th> <th>Value</th> <th>Standard Error</th> </tr> </thead> <tbody> <tr> <td>Tau</td> <td>B1</td> <td>241.68899</td> <td>20.5144</td> </tr> <tr> <td>Tau</td> <td>B2</td> <td>0</td> <td>0</td> </tr> <tr> <td>Tau</td> <td>B3</td> <td>0</td> <td>0</td> </tr> <tr> <td>Tau</td> <td>C_Raman</td> <td>3.84975</td> <td>0.34625</td> </tr> <tr> <td>Tau</td> <td>n_Raman</td> <td>7.72281</td> <td>0.28647</td> </tr> <tr> <td>Tau</td> <td>H</td> <td>500</td> <td>0</td> </tr> </tbody> </table>                                                                                                                                                                                                                                                                                                                                                                               | Model                                                                            | Raman_QTM1     | Equation   | $\tau^{-1} = C_{Raman} T^{n_{Raman}} + B$                | Reduced Chi-Sqr | 8.91386E-12 | Adj. R-Square | 0.99988 | Parameter | Value | Standard Error | Tau | B1      | 241.68899  | 20.5144    | Tau | B2      | 0        | 0       | Tau                                                                                                                                                                                                                                                            | B3        | 0        | 0                                   | Tau             | C_Raman    | 3.84975       | 0.34625    | Tau       | n_Raman | 7.72281        | 0.28647 | Tau | H          | 500        | 0   | <p><b>Raman+ QTM</b></p> $\tau^{-1} = C_{Raman} T^{n_{Raman}} + B$ <p><math>T = 2-3.5</math> K<br/> <math>C_{Raman} = 3.8 \pm 0.3</math> s<math>^{-1}</math>K<math>^{-n_{Raman}}</math><br/> <math>n_{Raman} = 7.7 \pm 0.1</math><br/> <math>B = 242 \pm 21</math> s<math>^{-1}</math><br/> <math>R^2 = 0.99988</math></p> |          |         |                                                                                                                                                                                                                                                                                                                                                                                                                                                     |
| Model                                                                                                                                                                                                                                                                                                                                                                                                                                                                                                                                                                                                                                                                                                                                                                                                                                                                                                                                                                                                                                                                                                                                                                                                                                                                                                                                                                                                                                | Raman_QTM1                                                                       |                |            |                                                          |                 |             |               |         |           |       |                |     |         |            |            |     |         |          |         |                                                                                                                                                                                                                                                                |           |          |                                     |                 |            |               |            |           |         |                |         |     |            |            |     |                                                                                                                                                                                                                                                                                                                            |          |         |                                                                                                                                                                                                                                                                                                                                                                                                                                                     |
| Equation                                                                                                                                                                                                                                                                                                                                                                                                                                                                                                                                                                                                                                                                                                                                                                                                                                                                                                                                                                                                                                                                                                                                                                                                                                                                                                                                                                                                                             | $\tau^{-1} = C_{Raman} T^{n_{Raman}} + B$                                        |                |            |                                                          |                 |             |               |         |           |       |                |     |         |            |            |     |         |          |         |                                                                                                                                                                                                                                                                |           |          |                                     |                 |            |               |            |           |         |                |         |     |            |            |     |                                                                                                                                                                                                                                                                                                                            |          |         |                                                                                                                                                                                                                                                                                                                                                                                                                                                     |
| Reduced Chi-Sqr                                                                                                                                                                                                                                                                                                                                                                                                                                                                                                                                                                                                                                                                                                                                                                                                                                                                                                                                                                                                                                                                                                                                                                                                                                                                                                                                                                                                                      | 8.91386E-12                                                                      |                |            |                                                          |                 |             |               |         |           |       |                |     |         |            |            |     |         |          |         |                                                                                                                                                                                                                                                                |           |          |                                     |                 |            |               |            |           |         |                |         |     |            |            |     |                                                                                                                                                                                                                                                                                                                            |          |         |                                                                                                                                                                                                                                                                                                                                                                                                                                                     |
| Adj. R-Square                                                                                                                                                                                                                                                                                                                                                                                                                                                                                                                                                                                                                                                                                                                                                                                                                                                                                                                                                                                                                                                                                                                                                                                                                                                                                                                                                                                                                        | 0.99988                                                                          |                |            |                                                          |                 |             |               |         |           |       |                |     |         |            |            |     |         |          |         |                                                                                                                                                                                                                                                                |           |          |                                     |                 |            |               |            |           |         |                |         |     |            |            |     |                                                                                                                                                                                                                                                                                                                            |          |         |                                                                                                                                                                                                                                                                                                                                                                                                                                                     |
| Parameter                                                                                                                                                                                                                                                                                                                                                                                                                                                                                                                                                                                                                                                                                                                                                                                                                                                                                                                                                                                                                                                                                                                                                                                                                                                                                                                                                                                                                            | Value                                                                            | Standard Error |            |                                                          |                 |             |               |         |           |       |                |     |         |            |            |     |         |          |         |                                                                                                                                                                                                                                                                |           |          |                                     |                 |            |               |            |           |         |                |         |     |            |            |     |                                                                                                                                                                                                                                                                                                                            |          |         |                                                                                                                                                                                                                                                                                                                                                                                                                                                     |
| Tau                                                                                                                                                                                                                                                                                                                                                                                                                                                                                                                                                                                                                                                                                                                                                                                                                                                                                                                                                                                                                                                                                                                                                                                                                                                                                                                                                                                                                                  | B1                                                                               | 241.68899      | 20.5144    |                                                          |                 |             |               |         |           |       |                |     |         |            |            |     |         |          |         |                                                                                                                                                                                                                                                                |           |          |                                     |                 |            |               |            |           |         |                |         |     |            |            |     |                                                                                                                                                                                                                                                                                                                            |          |         |                                                                                                                                                                                                                                                                                                                                                                                                                                                     |
| Tau                                                                                                                                                                                                                                                                                                                                                                                                                                                                                                                                                                                                                                                                                                                                                                                                                                                                                                                                                                                                                                                                                                                                                                                                                                                                                                                                                                                                                                  | B2                                                                               | 0              | 0          |                                                          |                 |             |               |         |           |       |                |     |         |            |            |     |         |          |         |                                                                                                                                                                                                                                                                |           |          |                                     |                 |            |               |            |           |         |                |         |     |            |            |     |                                                                                                                                                                                                                                                                                                                            |          |         |                                                                                                                                                                                                                                                                                                                                                                                                                                                     |
| Tau                                                                                                                                                                                                                                                                                                                                                                                                                                                                                                                                                                                                                                                                                                                                                                                                                                                                                                                                                                                                                                                                                                                                                                                                                                                                                                                                                                                                                                  | B3                                                                               | 0              | 0          |                                                          |                 |             |               |         |           |       |                |     |         |            |            |     |         |          |         |                                                                                                                                                                                                                                                                |           |          |                                     |                 |            |               |            |           |         |                |         |     |            |            |     |                                                                                                                                                                                                                                                                                                                            |          |         |                                                                                                                                                                                                                                                                                                                                                                                                                                                     |
| Tau                                                                                                                                                                                                                                                                                                                                                                                                                                                                                                                                                                                                                                                                                                                                                                                                                                                                                                                                                                                                                                                                                                                                                                                                                                                                                                                                                                                                                                  | C_Raman                                                                          | 3.84975        | 0.34625    |                                                          |                 |             |               |         |           |       |                |     |         |            |            |     |         |          |         |                                                                                                                                                                                                                                                                |           |          |                                     |                 |            |               |            |           |         |                |         |     |            |            |     |                                                                                                                                                                                                                                                                                                                            |          |         |                                                                                                                                                                                                                                                                                                                                                                                                                                                     |
| Tau                                                                                                                                                                                                                                                                                                                                                                                                                                                                                                                                                                                                                                                                                                                                                                                                                                                                                                                                                                                                                                                                                                                                                                                                                                                                                                                                                                                                                                  | n_Raman                                                                          | 7.72281        | 0.28647    |                                                          |                 |             |               |         |           |       |                |     |         |            |            |     |         |          |         |                                                                                                                                                                                                                                                                |           |          |                                     |                 |            |               |            |           |         |                |         |     |            |            |     |                                                                                                                                                                                                                                                                                                                            |          |         |                                                                                                                                                                                                                                                                                                                                                                                                                                                     |
| Tau                                                                                                                                                                                                                                                                                                                                                                                                                                                                                                                                                                                                                                                                                                                                                                                                                                                                                                                                                                                                                                                                                                                                                                                                                                                                                                                                                                                                                                  | H                                                                                | 500            | 0          |                                                          |                 |             |               |         |           |       |                |     |         |            |            |     |         |          |         |                                                                                                                                                                                                                                                                |           |          |                                     |                 |            |               |            |           |         |                |         |     |            |            |     |                                                                                                                                                                                                                                                                                                                            |          |         |                                                                                                                                                                                                                                                                                                                                                                                                                                                     |

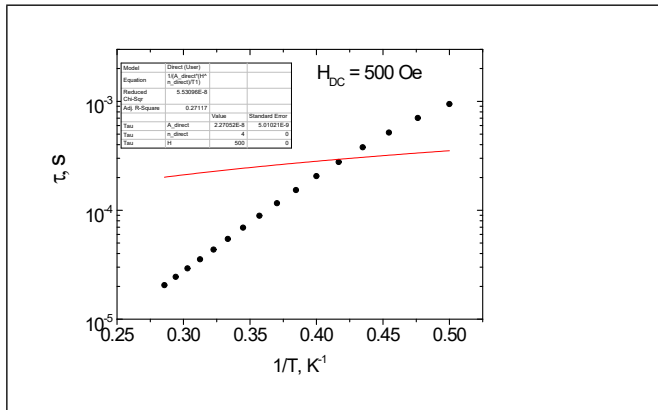

**Direct**  
 $\tau^{-1} = A_{direct} T H^4$   
 $T = 2-3.5 \text{ K}$   
 $A_{direct} = 2.3 \cdot 10^{-8} \pm 5 \cdot 10^{-9} \text{ K}^{-1} \text{Oe}^{-4} \text{s}^{-1}$   
 $R^2 = 0.27117$

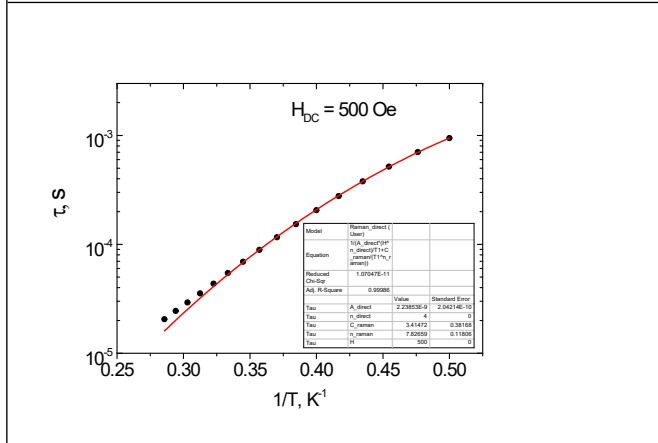

**Raman+Direct**  
 $\tau^{-1} = C_{Raman} T^{n_{Raman}} + A_{direct} T H^4$   
 $T = 2-3.5 \text{ K}$   
 $C_{Raman} = 3.4 \pm 0.4 \text{ s}^{-1} \text{K}^{-n_{Raman}}$   
 $n_{Raman} = 7.8 \pm 0.1$   
 $A_{direct} = 2.2 \cdot 10^{-9} \pm 2 \cdot 10^{-10} \text{ K}^{-1} \text{Oe}^{-4} \text{s}^{-1}$   
 $R^2 = 0.99986$

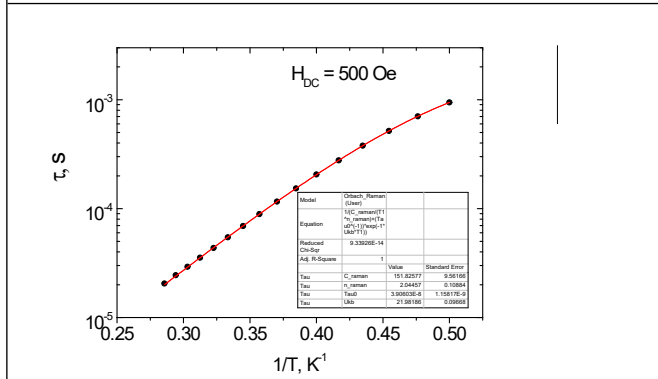

**Orbach+Raman**  
 $\tau^{-1} = \tau_0^{-1} \cdot \exp\{-\Delta E/kT\} + C_{Raman} T^{n_{Raman}}$   
 $T = 2-3.5 \text{ K}$   
 $\Delta E/k = 22.0 \pm 0.1 \text{ K}$   
 $\tau_0 = 3.9 \cdot 10^{-8} \pm 1 \cdot 10^{-9} \text{ s}$   
 $C_{Raman} = 152 \pm 10 \text{ s}^{-1} \text{K}^{-n_{Raman}}$   
 $n_{Raman} = 2.0 \pm 0.1$   
 $R^2 = 1$

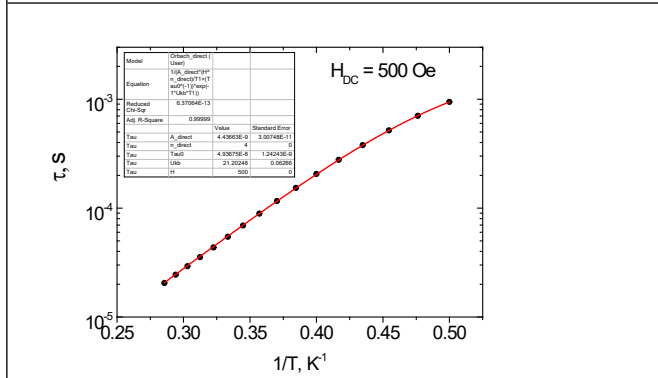

**Orbach+Direct**  
 $\tau^{-1} = \tau_0^{-1} \cdot \exp\{-\Delta E/kT\} + A_{direct} T H^4$   
 $T = 2-3.5 \text{ K}$   
 $\Delta E/k = 21.20 \pm 0.06 \text{ K}$   
 $\tau_0 = 4.9 \cdot 10^{-8} \pm 1 \cdot 10^{-9} \text{ s}$   
 $A_{direct} = 4.44 \cdot 10^{-9} \pm 3 \cdot 10^{-11} \text{ K}^{-1} \text{Oe}^{-4} \text{s}^{-1}$   
 $R^2 = 0.99999$

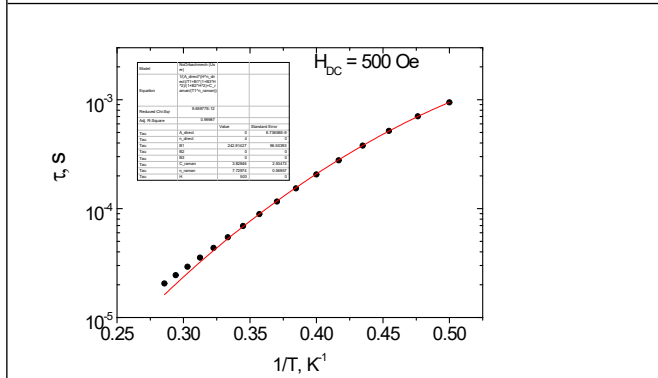

**Raman+Direct+QTM**  
 $\tau^{-1} = C_{Raman} T^{n_{Raman}} + B + A_{direct} T H^4$   
 $T = 2-3.5 \text{ K}$   
 $A_{direct} = 0 \pm 7 \cdot 10^{-9} \text{ K}^{-1} \text{Oe}^{-4} \text{s}^{-1}$   
 $C_{Raman} = 4 \pm 3 \text{ s}^{-1} \text{K}^{-n_{Raman}}$   
 $n_{Raman} = 7.7 \pm 0.6$   
 $B = 243 \pm 97 \text{ s}^{-1}$   
 $R^2 = 0.99987$   
*Over-parametrization*



**Table S11.** Fitting of the  $\tau$  vs.  $T$  and  $\tau$  vs.  $H$  dependences for  $2Dy$ .

|                                                                                                                                                                               |                                                                                                                                                                                                                                                                                                                                                                                                                                                                                                                                                          |
|-------------------------------------------------------------------------------------------------------------------------------------------------------------------------------|----------------------------------------------------------------------------------------------------------------------------------------------------------------------------------------------------------------------------------------------------------------------------------------------------------------------------------------------------------------------------------------------------------------------------------------------------------------------------------------------------------------------------------------------------------|
| <p>Dependences of the relaxation time <math>\tau</math> on the reciprocal temperature and field for <math>2Dy</math> (<math>H = 500</math> Oe, <math>T = 2-3.5</math> K).</p> | <p>Fit function, temperature range, and the best-fit parameters with uncertainties.</p>                                                                                                                                                                                                                                                                                                                                                                                                                                                                  |
| 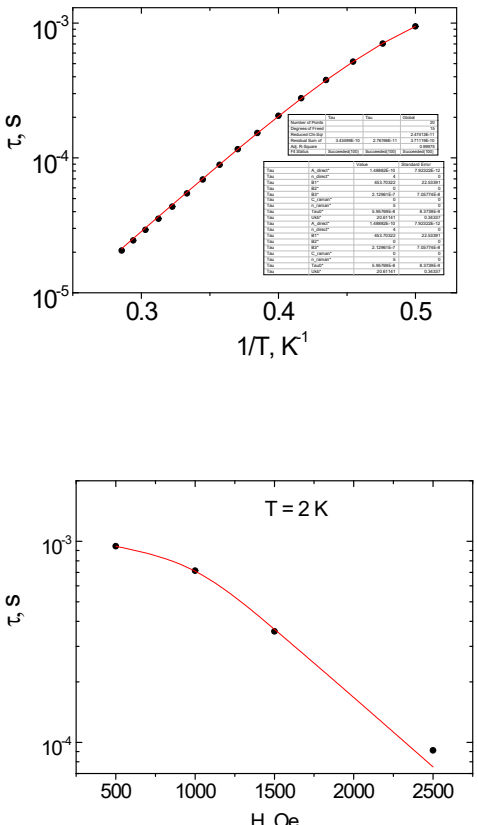                                                                                            | <p><b>Orbach+Direct+QTM</b></p> <p><i>Simultaneous fit</i></p> $\tau^{-1} = \tau_0^{-1} \cdot \exp\{-\Delta E/kT\} + B_1 \cdot (1 + B_3 \cdot H^2) + A_{direct} TH^4$ <p><math>T = 2-3.5</math> K; <math>H = 500-2500</math> Oe</p> $A_{direct} = 1.49 \cdot 10^{-10} \pm 8 \cdot 10^{-12} \text{ K}^{-1} \text{Oe}^{-4} \text{s}^{-1}$ $B_1 = 454 \pm 23 \text{ s}^{-1}$ $B_3 = 2.1 \cdot 10^{-7} \pm 7 \cdot 10^{-8} \text{ Oe}^{-2}$ $\Delta E/k = 20.6 \pm 0.3 \text{ K}$ $\tau_0 = 6.0 \cdot 10^{-8} \pm 8 \cdot 10^{-9} \text{ s}$ $R^2 = 0.99975$ |

**Table S12.** Fitting of the  $\tau$  vs.  $T$  dependences for  $2_{Yb}$

| Dependence of the relaxation time $\tau$ on the reciprocal temperature for $2_{Yb}$ ( $H = 1000$ Oe, $T = 2-4$ K).                                                                                                                                                                                                                                                                                                                                                                                                                                                                                                                                                                                                                                                                                                                                                                                                                                                                                                                    | Fit function, temperature range, and the best-fit parameters with uncertainties.      |                   |            |                                                                                       |                 |             |               |         |     |         |            |            |     |         |         |         |                                                                                                                                                                                                                                                                               |         |          |                         |                 |             |               |            |     |     |            |            |     |   |         |         |                                                                                                                                                                                                                                                                                                                                                                                                                                                 |
|---------------------------------------------------------------------------------------------------------------------------------------------------------------------------------------------------------------------------------------------------------------------------------------------------------------------------------------------------------------------------------------------------------------------------------------------------------------------------------------------------------------------------------------------------------------------------------------------------------------------------------------------------------------------------------------------------------------------------------------------------------------------------------------------------------------------------------------------------------------------------------------------------------------------------------------------------------------------------------------------------------------------------------------|---------------------------------------------------------------------------------------|-------------------|------------|---------------------------------------------------------------------------------------|-----------------|-------------|---------------|---------|-----|---------|------------|------------|-----|---------|---------|---------|-------------------------------------------------------------------------------------------------------------------------------------------------------------------------------------------------------------------------------------------------------------------------------|---------|----------|-------------------------|-----------------|-------------|---------------|------------|-----|-----|------------|------------|-----|---|---------|---------|-------------------------------------------------------------------------------------------------------------------------------------------------------------------------------------------------------------------------------------------------------------------------------------------------------------------------------------------------------------------------------------------------------------------------------------------------|
| 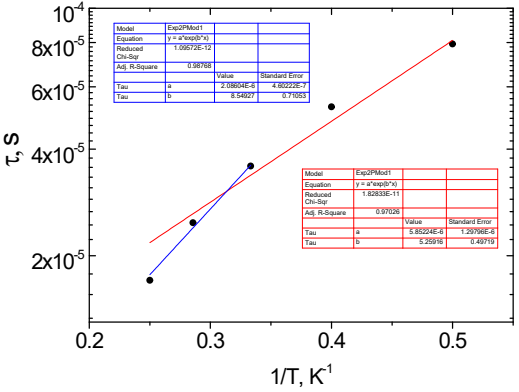 <table border="1" data-bbox="316 353 518 448"> <thead> <tr> <th>Model</th> <th>Eq2PM01</th> </tr> </thead> <tbody> <tr> <td>Equation</td> <td><math>y = a \cdot \exp(b/x)</math></td> </tr> <tr> <td>Reduced Chi-Sqr</td> <td>1.06972E-12</td> </tr> <tr> <td>Adj. R-Square</td> <td>0.98768</td> </tr> <tr> <td>Tau</td> <td>a</td> <td>2.18604E-6</td> <td>4.80222E-7</td> </tr> <tr> <td>Tau</td> <td>b</td> <td>8.54927</td> <td>0.71925</td> </tr> </tbody> </table> <table border="1" data-bbox="518 504 710 593"> <thead> <tr> <th>Model</th> <th>Eq2PM01</th> </tr> </thead> <tbody> <tr> <td>Equation</td> <td><math>y = a \cdot \exp(b/x)</math></td> </tr> <tr> <td>Reduced Chi-Sqr</td> <td>1.82838E-11</td> </tr> <tr> <td>Adj. R-Square</td> <td>0.97026</td> </tr> <tr> <td>Tau</td> <td>a</td> <td>5.85224E-6</td> <td>1.20799E-6</td> </tr> <tr> <td>Tau</td> <td>b</td> <td>5.25936</td> <td>0.49171</td> </tr> </tbody> </table> | Model                                                                                 | Eq2PM01           | Equation   | $y = a \cdot \exp(b/x)$                                                               | Reduced Chi-Sqr | 1.06972E-12 | Adj. R-Square | 0.98768 | Tau | a       | 2.18604E-6 | 4.80222E-7 | Tau | b       | 8.54927 | 0.71925 | Model                                                                                                                                                                                                                                                                         | Eq2PM01 | Equation | $y = a \cdot \exp(b/x)$ | Reduced Chi-Sqr | 1.82838E-11 | Adj. R-Square | 0.97026    | Tau | a   | 5.85224E-6 | 1.20799E-6 | Tau | b | 5.25936 | 0.49171 | <p><b>Orbach</b></p> $\tau = \tau_0 \cdot \exp\{\Delta E/kT\}$ <p><math>T = 3-4</math> K<br/> <math>\Delta E/k = 8.5 \pm 0.7</math> K<br/> <math>\tau_0 = 2.1 \cdot 10^{-6} \pm 5 \cdot 10^{-7}</math> s<br/> <math>R^2 = 0.98768</math> (blue line)</p> <p><math>T = 2-4</math> K<br/> <math>\Delta E/k = 5.3 \pm 0.5</math> K<br/> <math>\tau_0 = 6 \cdot 10^{-6} \pm 1 \cdot 10^{-6}</math> s<br/> <math>R^2 = 0.97026</math> (red line)</p> |
| Model                                                                                                                                                                                                                                                                                                                                                                                                                                                                                                                                                                                                                                                                                                                                                                                                                                                                                                                                                                                                                                 | Eq2PM01                                                                               |                   |            |                                                                                       |                 |             |               |         |     |         |            |            |     |         |         |         |                                                                                                                                                                                                                                                                               |         |          |                         |                 |             |               |            |     |     |            |            |     |   |         |         |                                                                                                                                                                                                                                                                                                                                                                                                                                                 |
| Equation                                                                                                                                                                                                                                                                                                                                                                                                                                                                                                                                                                                                                                                                                                                                                                                                                                                                                                                                                                                                                              | $y = a \cdot \exp(b/x)$                                                               |                   |            |                                                                                       |                 |             |               |         |     |         |            |            |     |         |         |         |                                                                                                                                                                                                                                                                               |         |          |                         |                 |             |               |            |     |     |            |            |     |   |         |         |                                                                                                                                                                                                                                                                                                                                                                                                                                                 |
| Reduced Chi-Sqr                                                                                                                                                                                                                                                                                                                                                                                                                                                                                                                                                                                                                                                                                                                                                                                                                                                                                                                                                                                                                       | 1.06972E-12                                                                           |                   |            |                                                                                       |                 |             |               |         |     |         |            |            |     |         |         |         |                                                                                                                                                                                                                                                                               |         |          |                         |                 |             |               |            |     |     |            |            |     |   |         |         |                                                                                                                                                                                                                                                                                                                                                                                                                                                 |
| Adj. R-Square                                                                                                                                                                                                                                                                                                                                                                                                                                                                                                                                                                                                                                                                                                                                                                                                                                                                                                                                                                                                                         | 0.98768                                                                               |                   |            |                                                                                       |                 |             |               |         |     |         |            |            |     |         |         |         |                                                                                                                                                                                                                                                                               |         |          |                         |                 |             |               |            |     |     |            |            |     |   |         |         |                                                                                                                                                                                                                                                                                                                                                                                                                                                 |
| Tau                                                                                                                                                                                                                                                                                                                                                                                                                                                                                                                                                                                                                                                                                                                                                                                                                                                                                                                                                                                                                                   | a                                                                                     | 2.18604E-6        | 4.80222E-7 |                                                                                       |                 |             |               |         |     |         |            |            |     |         |         |         |                                                                                                                                                                                                                                                                               |         |          |                         |                 |             |               |            |     |     |            |            |     |   |         |         |                                                                                                                                                                                                                                                                                                                                                                                                                                                 |
| Tau                                                                                                                                                                                                                                                                                                                                                                                                                                                                                                                                                                                                                                                                                                                                                                                                                                                                                                                                                                                                                                   | b                                                                                     | 8.54927           | 0.71925    |                                                                                       |                 |             |               |         |     |         |            |            |     |         |         |         |                                                                                                                                                                                                                                                                               |         |          |                         |                 |             |               |            |     |     |            |            |     |   |         |         |                                                                                                                                                                                                                                                                                                                                                                                                                                                 |
| Model                                                                                                                                                                                                                                                                                                                                                                                                                                                                                                                                                                                                                                                                                                                                                                                                                                                                                                                                                                                                                                 | Eq2PM01                                                                               |                   |            |                                                                                       |                 |             |               |         |     |         |            |            |     |         |         |         |                                                                                                                                                                                                                                                                               |         |          |                         |                 |             |               |            |     |     |            |            |     |   |         |         |                                                                                                                                                                                                                                                                                                                                                                                                                                                 |
| Equation                                                                                                                                                                                                                                                                                                                                                                                                                                                                                                                                                                                                                                                                                                                                                                                                                                                                                                                                                                                                                              | $y = a \cdot \exp(b/x)$                                                               |                   |            |                                                                                       |                 |             |               |         |     |         |            |            |     |         |         |         |                                                                                                                                                                                                                                                                               |         |          |                         |                 |             |               |            |     |     |            |            |     |   |         |         |                                                                                                                                                                                                                                                                                                                                                                                                                                                 |
| Reduced Chi-Sqr                                                                                                                                                                                                                                                                                                                                                                                                                                                                                                                                                                                                                                                                                                                                                                                                                                                                                                                                                                                                                       | 1.82838E-11                                                                           |                   |            |                                                                                       |                 |             |               |         |     |         |            |            |     |         |         |         |                                                                                                                                                                                                                                                                               |         |          |                         |                 |             |               |            |     |     |            |            |     |   |         |         |                                                                                                                                                                                                                                                                                                                                                                                                                                                 |
| Adj. R-Square                                                                                                                                                                                                                                                                                                                                                                                                                                                                                                                                                                                                                                                                                                                                                                                                                                                                                                                                                                                                                         | 0.97026                                                                               |                   |            |                                                                                       |                 |             |               |         |     |         |            |            |     |         |         |         |                                                                                                                                                                                                                                                                               |         |          |                         |                 |             |               |            |     |     |            |            |     |   |         |         |                                                                                                                                                                                                                                                                                                                                                                                                                                                 |
| Tau                                                                                                                                                                                                                                                                                                                                                                                                                                                                                                                                                                                                                                                                                                                                                                                                                                                                                                                                                                                                                                   | a                                                                                     | 5.85224E-6        | 1.20799E-6 |                                                                                       |                 |             |               |         |     |         |            |            |     |         |         |         |                                                                                                                                                                                                                                                                               |         |          |                         |                 |             |               |            |     |     |            |            |     |   |         |         |                                                                                                                                                                                                                                                                                                                                                                                                                                                 |
| Tau                                                                                                                                                                                                                                                                                                                                                                                                                                                                                                                                                                                                                                                                                                                                                                                                                                                                                                                                                                                                                                   | b                                                                                     | 5.25936           | 0.49171    |                                                                                       |                 |             |               |         |     |         |            |            |     |         |         |         |                                                                                                                                                                                                                                                                               |         |          |                         |                 |             |               |            |     |     |            |            |     |   |         |         |                                                                                                                                                                                                                                                                                                                                                                                                                                                 |
|  <table border="1" data-bbox="518 936 726 1108"> <thead> <tr> <th>Model</th> <th>Orbach_QTM (User)</th> </tr> </thead> <tbody> <tr> <td>Equation</td> <td><math>\frac{1}{\tau} = \frac{1}{\tau_0} \cdot \exp\left\{-\frac{\Delta E}{kT}\right\} + B</math></td> </tr> <tr> <td>Reduced Chi-Sqr</td> <td>9.0225E-13</td> </tr> <tr> <td>Adj. R-Square</td> <td>0.99853</td> </tr> <tr> <td>Tau</td> <td>B1</td> <td>9433.37151</td> <td>551.98616</td> </tr> <tr> <td>Tau</td> <td>B2</td> <td>0</td> <td>0</td> </tr> <tr> <td>Tau</td> <td>B3</td> <td>0</td> <td>0</td> </tr> <tr> <td>Tau</td> <td>Unk</td> <td>1.48566E-6</td> <td>3.06658E-7</td> </tr> <tr> <td>Tau</td> <td>Unk</td> <td>10.89593</td> <td>0.70641</td> </tr> <tr> <td>Tau</td> <td>H</td> <td>1000</td> <td>0</td> </tr> </tbody> </table>                                                                                                                                  | Model                                                                                 | Orbach_QTM (User) | Equation   | $\frac{1}{\tau} = \frac{1}{\tau_0} \cdot \exp\left\{-\frac{\Delta E}{kT}\right\} + B$ | Reduced Chi-Sqr | 9.0225E-13  | Adj. R-Square | 0.99853 | Tau | B1      | 9433.37151 | 551.98616  | Tau | B2      | 0       | 0       | Tau                                                                                                                                                                                                                                                                           | B3      | 0        | 0                       | Tau             | Unk         | 1.48566E-6    | 3.06658E-7 | Tau | Unk | 10.89593   | 0.70641    | Tau | H | 1000    | 0       | <p><b>Orbach+ QTM</b></p> $\tau^{-1} = \tau_0^{-1} \cdot \exp\{-\Delta E/kT\} + B$ <p><math>T = 2-4</math> K<br/> <math>\Delta E/k = 10.7 \pm 0.7</math> K<br/> <math>\tau_0 = 1.5 \cdot 10^{-6} \pm 3 \cdot 10^{-7}</math> s<br/> <math>B = 9433 \pm 552</math> s<sup>-1</sup><br/> <math>R^2 = 0.99853</math></p>                                                                                                                             |
| Model                                                                                                                                                                                                                                                                                                                                                                                                                                                                                                                                                                                                                                                                                                                                                                                                                                                                                                                                                                                                                                 | Orbach_QTM (User)                                                                     |                   |            |                                                                                       |                 |             |               |         |     |         |            |            |     |         |         |         |                                                                                                                                                                                                                                                                               |         |          |                         |                 |             |               |            |     |     |            |            |     |   |         |         |                                                                                                                                                                                                                                                                                                                                                                                                                                                 |
| Equation                                                                                                                                                                                                                                                                                                                                                                                                                                                                                                                                                                                                                                                                                                                                                                                                                                                                                                                                                                                                                              | $\frac{1}{\tau} = \frac{1}{\tau_0} \cdot \exp\left\{-\frac{\Delta E}{kT}\right\} + B$ |                   |            |                                                                                       |                 |             |               |         |     |         |            |            |     |         |         |         |                                                                                                                                                                                                                                                                               |         |          |                         |                 |             |               |            |     |     |            |            |     |   |         |         |                                                                                                                                                                                                                                                                                                                                                                                                                                                 |
| Reduced Chi-Sqr                                                                                                                                                                                                                                                                                                                                                                                                                                                                                                                                                                                                                                                                                                                                                                                                                                                                                                                                                                                                                       | 9.0225E-13                                                                            |                   |            |                                                                                       |                 |             |               |         |     |         |            |            |     |         |         |         |                                                                                                                                                                                                                                                                               |         |          |                         |                 |             |               |            |     |     |            |            |     |   |         |         |                                                                                                                                                                                                                                                                                                                                                                                                                                                 |
| Adj. R-Square                                                                                                                                                                                                                                                                                                                                                                                                                                                                                                                                                                                                                                                                                                                                                                                                                                                                                                                                                                                                                         | 0.99853                                                                               |                   |            |                                                                                       |                 |             |               |         |     |         |            |            |     |         |         |         |                                                                                                                                                                                                                                                                               |         |          |                         |                 |             |               |            |     |     |            |            |     |   |         |         |                                                                                                                                                                                                                                                                                                                                                                                                                                                 |
| Tau                                                                                                                                                                                                                                                                                                                                                                                                                                                                                                                                                                                                                                                                                                                                                                                                                                                                                                                                                                                                                                   | B1                                                                                    | 9433.37151        | 551.98616  |                                                                                       |                 |             |               |         |     |         |            |            |     |         |         |         |                                                                                                                                                                                                                                                                               |         |          |                         |                 |             |               |            |     |     |            |            |     |   |         |         |                                                                                                                                                                                                                                                                                                                                                                                                                                                 |
| Tau                                                                                                                                                                                                                                                                                                                                                                                                                                                                                                                                                                                                                                                                                                                                                                                                                                                                                                                                                                                                                                   | B2                                                                                    | 0                 | 0          |                                                                                       |                 |             |               |         |     |         |            |            |     |         |         |         |                                                                                                                                                                                                                                                                               |         |          |                         |                 |             |               |            |     |     |            |            |     |   |         |         |                                                                                                                                                                                                                                                                                                                                                                                                                                                 |
| Tau                                                                                                                                                                                                                                                                                                                                                                                                                                                                                                                                                                                                                                                                                                                                                                                                                                                                                                                                                                                                                                   | B3                                                                                    | 0                 | 0          |                                                                                       |                 |             |               |         |     |         |            |            |     |         |         |         |                                                                                                                                                                                                                                                                               |         |          |                         |                 |             |               |            |     |     |            |            |     |   |         |         |                                                                                                                                                                                                                                                                                                                                                                                                                                                 |
| Tau                                                                                                                                                                                                                                                                                                                                                                                                                                                                                                                                                                                                                                                                                                                                                                                                                                                                                                                                                                                                                                   | Unk                                                                                   | 1.48566E-6        | 3.06658E-7 |                                                                                       |                 |             |               |         |     |         |            |            |     |         |         |         |                                                                                                                                                                                                                                                                               |         |          |                         |                 |             |               |            |     |     |            |            |     |   |         |         |                                                                                                                                                                                                                                                                                                                                                                                                                                                 |
| Tau                                                                                                                                                                                                                                                                                                                                                                                                                                                                                                                                                                                                                                                                                                                                                                                                                                                                                                                                                                                                                                   | Unk                                                                                   | 10.89593          | 0.70641    |                                                                                       |                 |             |               |         |     |         |            |            |     |         |         |         |                                                                                                                                                                                                                                                                               |         |          |                         |                 |             |               |            |     |     |            |            |     |   |         |         |                                                                                                                                                                                                                                                                                                                                                                                                                                                 |
| Tau                                                                                                                                                                                                                                                                                                                                                                                                                                                                                                                                                                                                                                                                                                                                                                                                                                                                                                                                                                                                                                   | H                                                                                     | 1000              | 0          |                                                                                       |                 |             |               |         |     |         |            |            |     |         |         |         |                                                                                                                                                                                                                                                                               |         |          |                         |                 |             |               |            |     |     |            |            |     |   |         |         |                                                                                                                                                                                                                                                                                                                                                                                                                                                 |
|  <table border="1" data-bbox="491 1444 699 1545"> <thead> <tr> <th>Model</th> <th>Raman (User)</th> </tr> </thead> <tbody> <tr> <td>Equation</td> <td><math>\frac{1}{\tau} = C_{\text{Raman}} T^{n_{\text{Raman}}}</math></td> </tr> <tr> <td>Reduced Chi-Sqr</td> <td>3.72368E-12</td> </tr> <tr> <td>Adj. R-Square</td> <td>0.99394</td> </tr> <tr> <td>Tau</td> <td>C_Raman</td> <td>2987.66392</td> <td>296.53303</td> </tr> <tr> <td>Tau</td> <td>n_Raman</td> <td>2.05994</td> <td>0.09136</td> </tr> </tbody> </table>                                                                                                                                                                                                                                                                                                                                                                                                                      | Model                                                                                 | Raman (User)      | Equation   | $\frac{1}{\tau} = C_{\text{Raman}} T^{n_{\text{Raman}}}$                              | Reduced Chi-Sqr | 3.72368E-12 | Adj. R-Square | 0.99394 | Tau | C_Raman | 2987.66392 | 296.53303  | Tau | n_Raman | 2.05994 | 0.09136 | <p><b>Raman</b></p> $\tau^{-1} = C_{\text{Raman}} T^{n_{\text{Raman}}}$ <p><math>T = 2-4</math> K<br/> <math>C_{\text{Raman}} = 2988 \pm 237</math> s<sup>-1</sup>K<sup>-n_Raman</sup><br/> <math>n_{\text{Raman}} = 2.06 \pm 0.09</math><br/> <math>R^2 = 0.99394</math></p> |         |          |                         |                 |             |               |            |     |     |            |            |     |   |         |         |                                                                                                                                                                                                                                                                                                                                                                                                                                                 |
| Model                                                                                                                                                                                                                                                                                                                                                                                                                                                                                                                                                                                                                                                                                                                                                                                                                                                                                                                                                                                                                                 | Raman (User)                                                                          |                   |            |                                                                                       |                 |             |               |         |     |         |            |            |     |         |         |         |                                                                                                                                                                                                                                                                               |         |          |                         |                 |             |               |            |     |     |            |            |     |   |         |         |                                                                                                                                                                                                                                                                                                                                                                                                                                                 |
| Equation                                                                                                                                                                                                                                                                                                                                                                                                                                                                                                                                                                                                                                                                                                                                                                                                                                                                                                                                                                                                                              | $\frac{1}{\tau} = C_{\text{Raman}} T^{n_{\text{Raman}}}$                              |                   |            |                                                                                       |                 |             |               |         |     |         |            |            |     |         |         |         |                                                                                                                                                                                                                                                                               |         |          |                         |                 |             |               |            |     |     |            |            |     |   |         |         |                                                                                                                                                                                                                                                                                                                                                                                                                                                 |
| Reduced Chi-Sqr                                                                                                                                                                                                                                                                                                                                                                                                                                                                                                                                                                                                                                                                                                                                                                                                                                                                                                                                                                                                                       | 3.72368E-12                                                                           |                   |            |                                                                                       |                 |             |               |         |     |         |            |            |     |         |         |         |                                                                                                                                                                                                                                                                               |         |          |                         |                 |             |               |            |     |     |            |            |     |   |         |         |                                                                                                                                                                                                                                                                                                                                                                                                                                                 |
| Adj. R-Square                                                                                                                                                                                                                                                                                                                                                                                                                                                                                                                                                                                                                                                                                                                                                                                                                                                                                                                                                                                                                         | 0.99394                                                                               |                   |            |                                                                                       |                 |             |               |         |     |         |            |            |     |         |         |         |                                                                                                                                                                                                                                                                               |         |          |                         |                 |             |               |            |     |     |            |            |     |   |         |         |                                                                                                                                                                                                                                                                                                                                                                                                                                                 |
| Tau                                                                                                                                                                                                                                                                                                                                                                                                                                                                                                                                                                                                                                                                                                                                                                                                                                                                                                                                                                                                                                   | C_Raman                                                                               | 2987.66392        | 296.53303  |                                                                                       |                 |             |               |         |     |         |            |            |     |         |         |         |                                                                                                                                                                                                                                                                               |         |          |                         |                 |             |               |            |     |     |            |            |     |   |         |         |                                                                                                                                                                                                                                                                                                                                                                                                                                                 |
| Tau                                                                                                                                                                                                                                                                                                                                                                                                                                                                                                                                                                                                                                                                                                                                                                                                                                                                                                                                                                                                                                   | n_Raman                                                                               | 2.05994           | 0.09136    |                                                                                       |                 |             |               |         |     |         |            |            |     |         |         |         |                                                                                                                                                                                                                                                                               |         |          |                         |                 |             |               |            |     |     |            |            |     |   |         |         |                                                                                                                                                                                                                                                                                                                                                                                                                                                 |

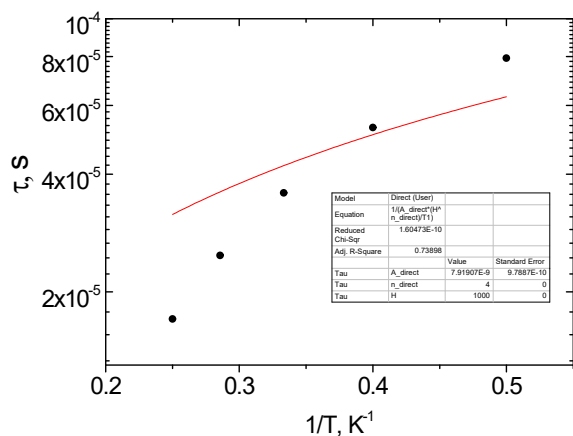

### Direct

$$\tau^{-1} = A_{direct}TH^4$$

$$T = 2-4 \text{ K}$$

$$A_{direct} = 8 \cdot 10^{-9} \pm 1 \cdot 10^{-9} \text{ K}^{-1} \text{Oe}^{-4} \text{s}^{-1}$$

$$R^2 = 0.73898$$

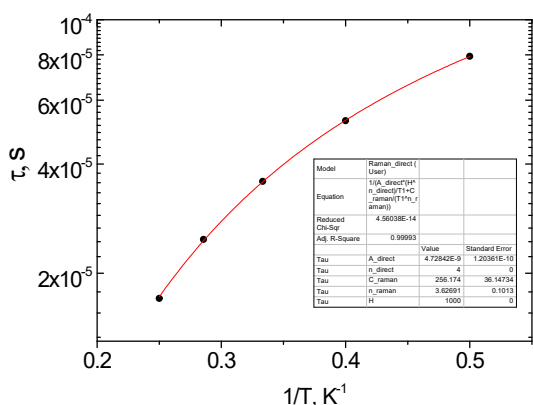

### Raman+Direct

$$\tau^{-1} = C_{Raman}T^{n_{Raman}} + A_{direct}TH^4$$

$$T = 2-4 \text{ K}$$

$$C_{Raman} = 256 \pm 36 \text{ s}^{-1} \text{K}^{-n_{Raman}}$$

$$n_{Raman} = 3.6 \pm 0.1$$

$$A_{direct} = 4.7 \cdot 10^{-9} \pm 1 \cdot 10^{-10} \text{ K}^{-1} \text{Oe}^{-4} \text{s}^{-1}$$

$$R^2 = 0.99993$$

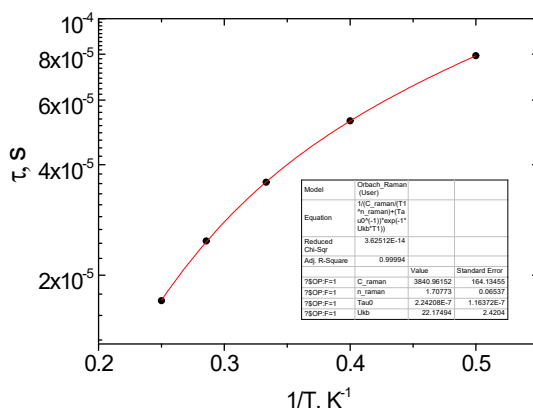

### Orbach+Raman

$$\tau^{-1} = \tau_0^{-1} \cdot \exp\{-\Delta E/kT\} + C_{Raman}T^{n_{Raman}}$$

$$T = 2-4 \text{ K}$$

$$\Delta E/k = 22 \pm 2 \text{ K}$$

$$\tau_0 = 2 \cdot 10^{-7} \pm 1 \cdot 10^{-7} \text{ s}$$

$$C_{Raman} = 3841 \pm 164 \text{ s}^{-1} \text{K}^{-n_{Raman}}$$

$$n_{Raman} = 1.71 \pm 0.07$$

$$R^2 = 0.99994$$

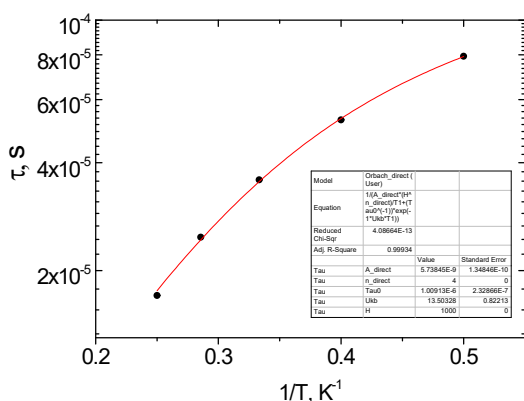

### Orbach+Direct

$$\tau^{-1} = \tau_0^{-1} \cdot \exp\{-\Delta E/kT\} + A_{direct}TH^4$$

$$T = 2-4 \text{ K}$$

$$\Delta E/k = 13.5 \pm 0.8 \text{ K}$$

$$\tau_0 = 1.0 \cdot 10^{-6} \pm 2 \cdot 10^{-7} \text{ s}$$

$$A_{direct} = 5.7 \cdot 10^{-9} \pm 1 \cdot 10^{-10} \text{ K}^{-1} \text{Oe}^{-4} \text{s}^{-1}$$

$$R^2 = 0.99934$$

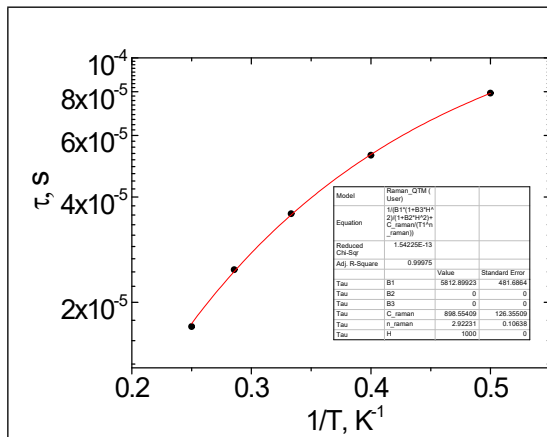

### Raman+QTM

$$\tau^{-1} = C_{\text{Raman}} T^{n_{\text{Raman}}} + B$$

$$T = 2-4 \text{ K}$$

$$C_{\text{Raman}} = 899 \pm 126 \text{ s}^{-1} \text{K}^{-n_{\text{Raman}}}$$

$$n_{\text{Raman}} = 2.9 \pm 0.1$$

$$B = 5813 \pm 482 \text{ s}^{-1}$$

$$R^2 = 0.99975$$

**Table S13.** Fitting of the  $\tau$  vs.  $T$  and  $\tau$  vs.  $H$  dependences for  $2Yb$ .

|                                                                                                                                                                              |                                                                                                                                                                                                                                                                                                                                                                                                                                                                                                                      |
|------------------------------------------------------------------------------------------------------------------------------------------------------------------------------|----------------------------------------------------------------------------------------------------------------------------------------------------------------------------------------------------------------------------------------------------------------------------------------------------------------------------------------------------------------------------------------------------------------------------------------------------------------------------------------------------------------------|
| <p>Dependences of the relaxation time <math>\tau</math> on the reciprocal temperature and field for <math>2Yb</math> (<math>H = 1000</math> Oe, <math>T = 2-4</math> K).</p> | <p>Fit function, temperature range, and the best-fit parameters with uncertainties.</p>                                                                                                                                                                                                                                                                                                                                                                                                                              |
| 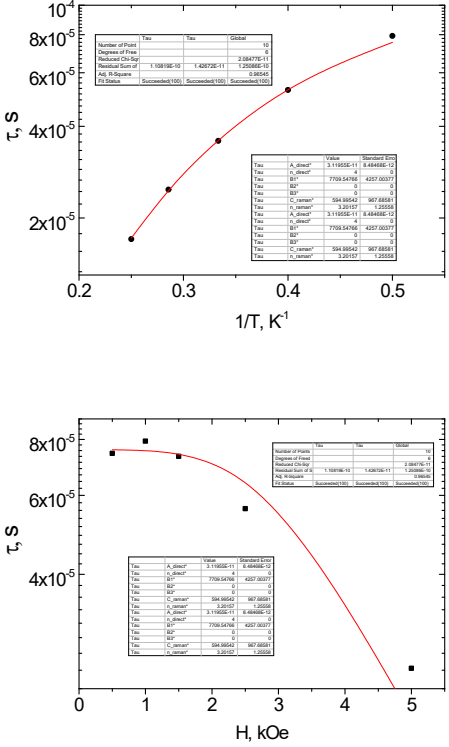                                                                                           | <p><b>Raman+Direct+QTM</b></p> <p><i>Simultaneous fit</i></p> $\tau^{-1} = \tau_0^{-1} \cdot \exp\{-\Delta E/kT\} + B + A_{direct}TH^4$ <p>Formulas with a greater number of parameters of QTM do not lead to better approximation.</p> <p><math>T = 2-4</math> K; <math>H = 500-5000</math> Oe</p> $C_{Raman} = 595 \pm 968 \text{ s}^{-1}K^{-n\_Raman}$ $n\_Raman = 3 \pm 1$ $A_{direct} = 3.1 \cdot 10^{-11} \pm 8 \cdot 10^{-12} \text{ K}^{-1}Oe^{-4}s^{-1}$ $B = 7710 \pm 4257 \text{ s}^{-1}$ $R^2 = 0.96545$ |
